# Supplementary material for: A Survey of Research Participants’ Privacy-Related Experiences and Willingness to Share Real-World Data with Researchers
Source: MDPI journal article supplement (doi:10.3390/jpm12111922), 2022-11-17
Supplement: s1 [file s1]

**Table S8.** Associations between willingness to share real-world data from various sources and had an unpleasant experience as a result of information posted online, adjusted for age range and education level.

| <b>Social Media Data</b>                                       |                            |                                |        |                |
|----------------------------------------------------------------|----------------------------|--------------------------------|--------|----------------|
| <b>Facebook data (n= 270)</b>                                  | <b>Adjusted Odds Ratio</b> | <b>95% confidence interval</b> |        | <b>P-Value</b> |
| Unpleasant experience as a result of information posted online | 1.079                      | 0.623                          | 1.868  | 0.7865         |
| Age range (ref = over 60)                                      |                            |                                |        |                |
| 18 to 30                                                       | 1.683                      | 0.765                          | 3.701  | 0.2734         |
| 31 to 40                                                       | 1.054                      | 0.502                          | 2.214  | 0.5228         |
| 41 to 50                                                       | 0.814                      | 0.367                          | 1.809  | 0.1401         |
| 51 to 60                                                       | 2.044                      | 0.933                          | 4.476  | 0.0745*        |
| Education (ref = Doctorate or other terminal degree)           |                            |                                |        |                |
| High school                                                    | 1.823                      | 0.278                          | 11.941 | 0.4083         |
| Some College/Associates/Trade School                           | 1.1                        | 0.372                          | 3.253  | 0.8563         |
| Bachelors                                                      | 0.839                      | 0.295                          | 2.39   | 0.4233         |
| Masters                                                        | 0.735                      | 0.254                          | 2.122  | 0.2052         |
| <b>Twitter data (n= 124)</b>                                   | <b>Adjusted Odds Ratio</b> | <b>95% confidence interval</b> |        | <b>P-Value</b> |
| Unpleasant experience as a result of information posted online | 0.729                      | 0.304                          | 1.752  | 0.48           |
| Age range (ref = over 60)                                      |                            |                                |        |                |
| 18 to 30                                                       | 3.911                      | 1.164                          | 13.139 | 0.2153         |
| 31 to 40                                                       | 2.574                      | 0.79                           | 8.384  | 0.8174         |
| 41 to 50                                                       | 1.249                      | 0.366                          | 4.267  | 0.1313         |
| 51 to 60                                                       | 5.728                      | 1.443                          | 22.735 | 0.0701*        |
| Education (ref = Doctorate or other terminal degree)           |                            |                                |        |                |
| High school                                                    | 0.754                      | 0.044                          | 13.042 | 0.8146         |
| Some College/Associates/Trade School                           | 0.302                      | 0.05                           | 1.812  | 0.1263         |
| Bachelors                                                      | 0.686                      | 0.12                           | 3.915  | 0.7414         |
| Masters                                                        | 0.491                      | 0.083                          | 2.898  | 0.6492         |
| <b>Instagram data (n= 189)</b>                                 | <b>Adjusted Odds Ratio</b> | <b>95% confidence interval</b> |        | <b>P-Value</b> |
| Unpleasant experience as a result of information posted online | 1.13                       | 0.602                          | 2.121  | 0.7033         |
| Age range (ref = over 60)                                      |                            |                                |        |                |
| 18 to 30                                                       | 1.732                      | 0.682                          | 4.396  | 0.8535         |
| 31 to 40                                                       | 1.518                      | 0.601                          | 3.836  | 0.7885         |

|                                                                |                                   |                                       |                       |         |
|----------------------------------------------------------------|-----------------------------------|---------------------------------------|-----------------------|---------|
| 41 to 50                                                       | 1.875                             | 0.687                                 | 5.118                 | 0.6873  |
| 51 to 60                                                       | 2.405                             | 0.781                                 | 7.404                 | 0.3244  |
| Education (ref = Doctorate or other terminal degree)           |                                   |                                       |                       |         |
| High school                                                    | 1.947                             | 0.16                                  | 23.643                | 0.598   |
| Some College/Associates/Trade School                           | 1.137                             | 0.33                                  | 3.923                 | 0.9171  |
| Bachelors                                                      | 1.332                             | 0.41                                  | 4.331                 | 0.7329  |
| Masters                                                        | 0.787                             | 0.243                                 | 2.55                  | 0.2376  |
| <b><i>Snapchat data (n= 104)</i></b>                           | <b><i>Adjusted Odds Ratio</i></b> | <b><i>95% confidence interval</i></b> | <b><i>P-Value</i></b> |         |
| Unpleasant experience as a result of information posted online | 1.51                              | 0.644                                 | 3.538                 | 0.3431  |
| Age range (ref = over 60)                                      |                                   |                                       |                       |         |
| 18 to 30                                                       | -                                 | -                                     | -                     | -       |
| 31 to 40                                                       | -                                 | -                                     | -                     | -       |
| 41 to 50                                                       | -                                 | -                                     | -                     | -       |
| 51 to 60                                                       | -                                 | -                                     | -                     | -       |
| Education (ref = Doctorate or other terminal degree)           |                                   |                                       |                       |         |
| High school                                                    | 0.737                             | 0.031                                 | 17.651                | 0.8564  |
| Some College/Associates/Trade School                           | 0.224                             | 0.037                                 | 1.353                 | 0.0674* |
| Bachelors                                                      | 0.543                             | 0.106                                 | 2.787                 | 0.8312  |
| Masters                                                        | 0.841                             | 0.147                                 | 4.812                 | 0.501   |
| <b><i>Yelp reviews and ratings data (n= 179)</i></b>           | <b><i>Adjusted Odds Ratio</i></b> | <b><i>95% confidence interval</i></b> | <b><i>P-Value</i></b> |         |
| Unpleasant experience as a result of information posted online | 1.299                             | 0.655                                 | 2.573                 | 0.4541  |
| Age range (ref = over 60)                                      |                                   |                                       |                       |         |
| 18 to 30                                                       | 2.04                              | 0.721                                 | 5.769                 | 0.8862  |
| 31 to 40                                                       | 2.196                             | 0.84                                  | 5.74                  | 0.716   |
| 41 to 50                                                       | 2.008                             | 0.793                                 | 5.09                  | 0.9092  |
| 51 to 60                                                       | 2.981                             | 1.123                                 | 7.914                 | 0.2393  |
| Education (ref = Doctorate or other terminal degree)           |                                   |                                       |                       |         |
| High school                                                    | -                                 | -                                     | -                     | -       |
| Some College/Associates/Trade School                           | 0.635                             | 0.18                                  | 2.234                 | 0.9693  |
| Bachelors                                                      | 0.896                             | 0.255                                 | 3.15                  | 0.9734  |
| Masters                                                        | 0.95                              | 0.274                                 | 3.298                 | 0.9741  |

| <b>Health Data</b>                                             |                                   |                                       |        |                       |
|----------------------------------------------------------------|-----------------------------------|---------------------------------------|--------|-----------------------|
| <b><i>Fitness tracker data (n= 220)</i></b>                    | <b><i>Adjusted Odds Ratio</i></b> | <b><i>95% confidence interval</i></b> |        | <b><i>P-Value</i></b> |
| Unpleasant experience as a result of information posted online | 0.906                             | 0.459                                 | 1.788  | 0.7769                |
| Age range (ref = over 60)                                      |                                   |                                       |        |                       |
| 18 to 30                                                       | 3.385                             | 1.228                                 | 9.328  | 0.2423                |
| 31 to 40                                                       | 2.043                             | 0.872                                 | 4.787  | 0.8466                |
| 41 to 50                                                       | 1.933                             | 0.789                                 | 4.739  | 0.7328                |
| 51 to 60                                                       | 3.605                             | 1.294                                 | 10.038 | 0.1963                |
| Education (ref = Doctorate or other terminal degree)           |                                   |                                       |        |                       |
| High school                                                    | 0.564                             | 0.072                                 | 4.425  | 0.5342                |
| Some College/Associates/Trade School                           | 0.997                             | 0.331                                 | 3.009  | 0.7869                |
| Bachelors                                                      | 1.09                              | 0.358                                 | 3.325  | 0.5968                |
| Masters                                                        | 1.012                             | 0.352                                 | 2.907  | 0.7304                |
| <b><i>Prescription history data (n= 351)</i></b>               | <b><i>Adjusted Odds Ratio</i></b> | <b><i>95% confidence interval</i></b> |        | <b><i>P-Value</i></b> |
| Unpleasant experience as a result of information posted online | 0.927                             | 0.573                                 | 1.499  | 0.7561                |
| Age range (ref = over 60)                                      |                                   |                                       |        |                       |
| 18 to 30                                                       | 1.285                             | 0.658                                 | 2.51   | 0.1139                |
| 31 to 40                                                       | 0.904                             | 0.486                                 | 1.682  | 0.877                 |
| 41 to 50                                                       | 0.5                               | 0.248                                 | 1.009  | 0.0329**              |
| 51 to 60                                                       | 0.872                             | 0.468                                 | 1.626  | 0.9973                |
| Education (ref = Doctorate or other terminal degree)           |                                   |                                       |        |                       |
| High school                                                    | 0.99                              | 0.236                                 | 4.152  | 0.7546                |
| Some College/Associates/Trade School                           | 1.476                             | 0.612                                 | 3.556  | 0.3062                |
| Bachelors                                                      | 1.552                             | 0.659                                 | 3.652  | 0.1877                |
| Masters                                                        | 0.925                             | 0.391                                 | 2.189  | 0.3149                |
| <b><i>Electronic medical record data (n= 351)</i></b>          | <b><i>Adjusted Odds Ratio</i></b> | <b><i>95% confidence interval</i></b> |        | <b><i>P-Value</i></b> |
| Unpleasant experience as a result of information posted online | 1                                 | 0.623                                 | 1.605  | 0.9995                |
| Age range (ref = over 60)                                      |                                   |                                       |        |                       |
| 18 to 30                                                       | 0.491                             | 0.254                                 | 0.949  | 0.2967                |
| 31 to 40                                                       | 0.671                             | 0.36                                  | 1.25   | 0.7758                |
| 41 to 50                                                       | 0.518                             | 0.259                                 | 1.035  | 0.4457                |
| 51 to 60                                                       | 0.58                              | 0.309                                 | 1.088  | 0.7194                |
| Education (ref = Doctorate or other terminal degree)           |                                   |                                       |        |                       |

|                                                                |                            |                                |                |         |
|----------------------------------------------------------------|----------------------------|--------------------------------|----------------|---------|
| High school                                                    | 0.68                       | 0.138                          | 3.35           | 0.5826  |
| Some College/Associates/Trade School                           | 0.992                      | 0.415                          | 2.371          | 0.816   |
| Bachelors                                                      | 1.205                      | 0.518                          | 2.8            | 0.2746  |
| Masters                                                        | 0.889                      | 0.378                          | 2.092          | 0.8251  |
| <b>Genetic data (n= 247)</b>                                   | <b>Adjusted Odds Ratio</b> | <b>95% confidence interval</b> | <b>P-Value</b> |         |
| Unpleasant experience as a result of information posted online | 0.992                      | 0.551                          | 1.785          | 0.9791  |
| Age range (ref = over 60)                                      |                            |                                |                |         |
| 18 to 30                                                       | 0.707                      | 0.32                           | 1.563          | 0.5105  |
| 31 to 40                                                       | 0.851                      | 0.386                          | 1.88           | 0.9881  |
| 41 to 50                                                       | 0.638                      | 0.295                          | 1.379          | 0.3047  |
| 51 to 60                                                       | 1.191                      | 0.552                          | 2.568          | 0.2414  |
| Education (ref = Doctorate or other terminal degree)           |                            |                                |                |         |
| High school                                                    | 0.129                      | 0.013                          | 1.28           | 0.0879* |
| Some College/Associates/Trade School                           | 1.064                      | 0.396                          | 2.857          | 0.0623* |
| Bachelors                                                      | 0.819                      | 0.317                          | 2.119          | 0.2685  |
| Masters                                                        | 0.593                      | 0.227                          | 1.549          | 0.9514  |
| <b>Direct Communication Data</b>                               |                            |                                |                |         |
| <b>Text message and phone data (n= 352)</b>                    | <b>Adjusted Odds Ratio</b> | <b>95% confidence interval</b> | <b>P-Value</b> |         |
| Unpleasant experience as a result of information posted online | 1.324                      | 0.803                          | 2.182          | 0.2709  |
| Age range (ref = over 60)                                      |                            |                                |                |         |
| 18 to 30                                                       | 0.993                      | 0.485                          | 2.035          | 0.832   |
| 31 to 40                                                       | 1.395                      | 0.724                          | 2.687          | 0.2175  |
| 41 to 50                                                       | 0.716                      | 0.321                          | 1.599          | 0.1984  |
| 51 to 60                                                       | 1.281                      | 0.657                          | 2.494          | 0.4045  |
| Education (ref = Doctorate or other terminal degree)           |                            |                                |                |         |
| High school                                                    | 1.474                      | 0.324                          | 6.712          | 0.4932  |
| Some College/Associates/Trade School                           | 1.092                      | 0.43                           | 2.772          | 0.7863  |
| Bachelors                                                      | 0.987                      | 0.398                          | 2.45           | 0.8833  |
| Masters                                                        | 0.7                        | 0.274                          | 1.786          | 0.1306  |
| <b>Email history data (n= 354)</b>                             | <b>Adjusted Odds Ratio</b> | <b>95% confidence interval</b> | <b>P-Value</b> |         |
| Unpleasant experience as a result of information posted online | 1.371                      | 0.833                          | 2.256          | 0.214   |
| Age range (ref = over 60)                                      |                            |                                |                |         |
| 18 to 30                                                       | 0.765                      | 0.375                          | 1.56           | 0.3991  |

|                                                                |                            |                                |        |                |
|----------------------------------------------------------------|----------------------------|--------------------------------|--------|----------------|
| 31 to 40                                                       | 0.997                      | 0.512                          | 1.94   | 0.841          |
| 41 to 50                                                       | 0.698                      | 0.322                          | 1.516  | 0.2832         |
| 51 to 60                                                       | 1.457                      | 0.759                          | 2.796  | 0.0705*        |
| Education (ref = Doctorate or other terminal degree)           |                            |                                |        |                |
| High school                                                    | 3.717                      | 0.861                          | 16.056 | 0.0882*        |
| Some College/Associates/Trade School                           | 1.998                      | 0.792                          | 5.039  | 0.3036         |
| Bachelors                                                      | 1.573                      | 0.633                          | 3.907  | 0.9795         |
| Masters                                                        | 0.801                      | 0.309                          | 2.074  | 0.008**        |
| <b>Online Browsing or Streaming Data</b>                       |                            |                                |        |                |
| <b>Music streaming data (n= 271)</b>                           | <b>Adjusted Odds Ratio</b> | <b>95% confidence interval</b> |        | <b>P-Value</b> |
| Unpleasant experience as a result of information posted online | 1.24                       | 0.695                          | 2.215  | 0.4665         |
| Age range (ref = over 60)                                      |                            |                                |        |                |
| 18 to 30                                                       | 6.702                      | 2.812                          | 15.97  | 0.012**        |
| 31 to 40                                                       | 3.737                      | 1.73                           | 8.071  | 0.4896         |
| 41 to 50                                                       | 2.611                      | 1.158                          | 5.888  | 0.5397         |
| 51 to 60                                                       | 4.511                      | 1.924                          | 10.574 | 0.2185         |
| Education (ref = Doctorate or other terminal degree)           |                            |                                |        |                |
| High school                                                    | 1.068                      | 0.16                           | 7.11   | 0.9828         |
| Some College/Associates/Trade School                           | 1.187                      | 0.414                          | 3.4    | 0.695          |
| Bachelors                                                      | 0.82                       | 0.301                          | 2.236  | 0.3744         |
| Masters                                                        | 1.24                       | 0.441                          | 3.485  | 0.5775         |
| <b>Google search history data (n= 358)</b>                     | <b>Adjusted Odds Ratio</b> | <b>95% confidence interval</b> |        | <b>P-Value</b> |
| Unpleasant experience as a result of information posted online | 1.305                      | 0.814                          | 2.094  | 0.2692         |
| Age range (ref = over 60)                                      |                            |                                |        |                |
| 18 to 30                                                       | 1.041                      | 0.537                          | 2.02   | 0.7757         |
| 31 to 40                                                       | 1.187                      | 0.637                          | 2.211  | 0.7784         |
| 41 to 50                                                       | 0.841                      | 0.417                          | 1.697  | 0.2755         |
| 51 to 60                                                       | 1.657                      | 0.885                          | 3.103  | 0.0818*        |
| Education (ref = Doctorate or other terminal degree)           |                            |                                |        |                |
| High school                                                    | 3.227                      | 0.7                            | 14.888 | 0.0633*        |
| Some College/Associates/Trade School                           | 1.139                      | 0.489                          | 2.649  | 0.9846         |
| Bachelors                                                      | 0.722                      | 0.317                          | 1.643  | 0.0426**       |
| Masters                                                        | 0.738                      | 0.321                          | 1.697  | 0.0597*        |

| <b>Financial Data</b>                                          |                                   |                                       |        |                       |
|----------------------------------------------------------------|-----------------------------------|---------------------------------------|--------|-----------------------|
| <b><i>Online purchase history data (n= 355)</i></b>            | <b><i>Adjusted Odds Ratio</i></b> | <b><i>95% confidence interval</i></b> |        | <b><i>P-Value</i></b> |
| Unpleasant experience as a result of information posted online | 1.306                             | 0.816                                 | 2.092  | 0.2663                |
| Age range (ref = over 60)                                      |                                   |                                       |        |                       |
| 18 to 30                                                       | 1.411                             | 0.732                                 | 2.72   | 0.6974                |
| 31 to 40                                                       | 1.438                             | 0.774                                 | 2.671  | 0.617                 |
| 41 to 50                                                       | 1.01                              | 0.503                                 | 2.028  | 0.3448                |
| 51 to 60                                                       | 1.725                             | 0.914                                 | 3.255  | 0.2052                |
| Education (ref = Doctorate or other terminal degree)           |                                   |                                       |        |                       |
| High school                                                    | 8.378                             | 0.927                                 | 75.706 | 0.0313**              |
| Some College/Associates/Trade School                           | 0.922                             | 0.392                                 | 2.168  | 0.2001                |
| Bachelors                                                      | 0.791                             | 0.345                                 | 1.811  | 0.058*                |
| Masters                                                        | 0.696                             | 0.3                                   | 1.619  | 0.0217**              |
| <b><i>Tax records and income history data (n= 348)</i></b>     | <b><i>Adjusted Odds Ratio</i></b> | <b><i>95% confidence interval</i></b> |        | <b><i>P-Value</i></b> |
| Unpleasant experience as a result of information posted online | 1.574                             | 0.898                                 | 2.756  | 0.1129                |
| Age range (ref = over 60)                                      |                                   |                                       |        |                       |
| 18 to 30                                                       | 1.066                             | 0.472                                 | 2.409  | 0.9744                |
| 31 to 40                                                       | 1.586                             | 0.768                                 | 3.277  | 0.1071                |
| 41 to 50                                                       | 0.951                             | 0.395                                 | 2.29   | 0.7455                |
| 51 to 60                                                       | 0.819                             | 0.359                                 | 1.868  | 0.3935                |
| Education (ref = Doctorate or other terminal degree)           |                                   |                                       |        |                       |
| High school                                                    | 2.902                             | 0.498                                 | 16.915 | 0.1431                |
| Some College/Associates/Trade School                           | 0.883                             | 0.321                                 | 2.43   | 0.3952                |
| Bachelors                                                      | 0.769                             | 0.287                                 | 2.06   | 0.1561                |
| Masters                                                        | 0.939                             | 0.349                                 | 2.53   | 0.505                 |
| <b><i>Credit card statement data (n=341)</i></b>               | <b><i>Adjusted Odds Ratio</i></b> | <b><i>95% confidence interval</i></b> |        | <b><i>P-Value</i></b> |
| Unpleasant experience as a result of information posted online | 1.564                             | 0.88                                  | 2.78   | 0.1273                |
| Age range (ref = over 60)                                      |                                   |                                       |        |                       |
| Indent 18 to 30                                                | 0.668                             | 0.291                                 | 1.53   | 0.5828                |
| Indent 31 to 40                                                | 0.793                             | 0.363                                 | 1.731  | 0.9886                |
| Indent 41 to 50                                                | 0.881                             | 0.377                                 | 2.059  | 0.7322                |
| Indent 51 to 60                                                | 0.659                             | 0.294                                 | 1.479  | 0.5488                |
| Education                                                      |                                   |                                       |        |                       |

|                                                                |                                   |                                       |        |                       |
|----------------------------------------------------------------|-----------------------------------|---------------------------------------|--------|-----------------------|
| High school                                                    | 3.52                              | 0.7                                   | 17.706 | 0.0544**              |
| Some College/Associates/Trade School                           | 0.977                             | 0.339                                 | 2.818  | 0.4811                |
| Bachelors                                                      | 0.997                             | 0.358                                 | 2.78   | 0.4946                |
| Masters                                                        | 0.704                             | 0.245                                 | 2.021  | 0.0618*               |
| <b>Location Data</b>                                           |                                   |                                       |        |                       |
| <b><i>Ridesharing history data (n= 199)</i></b>                | <b><i>Adjusted Odds Ratio</i></b> | <b><i>95% confidence interval</i></b> |        | <b><i>P-Value</i></b> |
| Unpleasant experience as a result of information posted online | 1.008                             | 0.533                                 | 1.905  | 0.9815                |
| Age range (ref = over 60)                                      |                                   |                                       |        |                       |
| 18 to 30                                                       | 3.079                             | 1.302                                 | 7.279  | 0.2222                |
| 31 to 40                                                       | 2.173                             | 0.898                                 | 5.257  | 0.9794                |
| 41 to 50                                                       | 2.925                             | 1.114                                 | 7.679  | 0.3922                |
| 51 to 60                                                       | 2.573                             | 0.982                                 | 6.737  | 0.628                 |
| Education (ref = Doctorate or other terminal degree)           |                                   |                                       |        |                       |
| High school                                                    | 2.048                             | 0.251                                 | 16.681 | 0.512                 |
| Some College/Associates/Trade School                           | 1.189                             | 0.363                                 | 3.888  | 0.9032                |
| Bachelors                                                      | 1.148                             | 0.377                                 | 3.499  | 0.8033                |
| Masters                                                        | 1.046                             | 0.332                                 | 3.295  | 0.5914                |
| <b><i>Geolocation data (n= 342)</i></b>                        | <b><i>Adjusted Odds Ratio</i></b> | <b><i>95% confidence interval</i></b> |        | <b><i>P-Value</i></b> |
| Unpleasant experience as a result of information posted online | 1.088                             | 0.671                                 | 1.763  | 0.7318                |
| Age range (ref = over 60)                                      |                                   |                                       |        |                       |
| 18 to 30                                                       | 1.179                             | 0.6                                   | 2.317  | 0.8837                |
| 31 to 40                                                       | 1.392                             | 0.733                                 | 2.642  | 0.563                 |
| 41 to 50                                                       | 0.981                             | 0.478                                 | 2.013  | 0.3987                |
| 51 to 60                                                       | 1.689                             | 0.879                                 | 3.245  | 0.1643                |
| Education (ref = Doctorate or other terminal degree)           |                                   |                                       |        |                       |
| High school                                                    | 1.459                             | 0.313                                 | 6.792  | 0.4472                |
| Some College/Associates/Trade School                           | 1.021                             | 0.429                                 | 2.431  | 0.7827                |
| Bachelors                                                      | 0.887                             | 0.381                                 | 2.069  | 0.748                 |
| Masters                                                        | 0.601                             | 0.253                                 | 1.431  | 0.055*                |
| <b><i>Voting History Data (n= 344)</i></b>                     | <b><i>Adjusted Odds Ratio</i></b> | <b><i>95% confidence interval</i></b> |        | <b><i>P-Value</i></b> |
| Unpleasant experience as a result of information posted online | 1.002                             | 0.618                                 | 1.624  | 0.9932                |
| Age range (ref = over 60)                                      |                                   |                                       |        |                       |
| 18 to 30                                                       | 3.023                             | 1.533                                 | 5.959  | 0.026**               |

|                                                      |       |       |       |        |
|------------------------------------------------------|-------|-------|-------|--------|
| 31 to 40                                             | 1.86  | 0.993 | 3.484 | 0.7862 |
| 41 to 50                                             | 1.999 | 0.981 | 4.076 | 0.6127 |
| 51 to 60                                             | 1.462 | 0.771 | 2.772 | 0.4383 |
| Education (ref = Doctorate or other terminal degree) |       |       |       |        |
| High school                                          | 0.999 | 0.213 | 4.676 | 0.6595 |
| Some College/Associates/Trade School                 | 1.755 | 0.72  | 4.278 | 0.1941 |
| Bachelors                                            | 1.553 | 0.654 | 3.691 | 0.3931 |
| Masters                                              | 1.245 | 0.52  | 2.98  | 0.9157 |

\*\*Significant value ( $p \leq 0.05$ )

\*Modestly significant value ( $p \leq 0.10$ )
