# Supplementary material for: A Survey of Research Participants’ Privacy-Related Experiences and Willingness to Share Real-World Data with Researchers
Source: MDPI journal article supplement (doi:10.3390/jpm12111922), 2022-11-17
Supplement: s1 [file s1]

**Table S2.** Participants' willingness to donate data sources who have been victims of fraud and/or identity theft online.

| Data Source                                          | Yes                                                |     |                                 |           | No                                                 |     |                                 |           | Unsure                                             |     |                                 |           |
|------------------------------------------------------|----------------------------------------------------|-----|---------------------------------|-----------|----------------------------------------------------|-----|---------------------------------|-----------|----------------------------------------------------|-----|---------------------------------|-----------|
|                                                      | Willingness to share data sources with researchers |     |                                 |           | Willingness to share data sources with researchers |     |                                 |           | Willingness to share data sources with researchers |     |                                 |           |
|                                                      | Yes                                                | No  | I don't use this source of data | Total (n) | Yes                                                | No  | I don't use this source of data | Total (n) | Yes                                                | No  | I don't use this source of data | Total (n) |
| Facebook data                                        | 44%                                                | 29% | 27%                             | 158       | 45%                                                | 31% | 25%                             | 204       | 53%                                                | 26% | 21%                             | 34        |
| Twitter data                                         | 22%                                                | 18% | 60%                             | 156       | 22%                                                | 11% | 67%                             | 204       | 21%                                                | 12% | 68%                             | 34        |
| Instagram data                                       | 34%                                                | 23% | 44%                             | 155       | 31%                                                | 21% | 49%                             | 204       | 26%                                                | 18% | 56%                             | 34        |
| Snapchat data                                        | 11%                                                | 20% | 69%                             | 157       | 13%                                                | 16% | 71%                             | 204       | 6%                                                 | 21% | 74%                             | 34        |
| Email History (Gmail, Yahoo, Comcast, Verizon, etc.) | 36%                                                | 61% | 3%                              | 157       | 30%                                                | 70% | 0%                              | 203       | 32%                                                | 68% | 0%                              | 34        |
| Text Message and Phone Call Data                     | 30%                                                | 66% | 3%                              | 158       | 29%                                                | 69% | 2%                              | 204       | 29%                                                | 71% | 0%                              | 34        |
| Google search history                                | 43%                                                | 57% | 0%                              | 157       | 42%                                                | 57% | 1%                              | 204       | 44%                                                | 56% | 0%                              | 34        |
| Online purchase history (Amazon, Target, Ebay, etc.) | 43%                                                | 55% | 1%                              | 157       | 49%                                                | 50% | 1%                              | 204       | 41%                                                | 59% | 0%                              | 34        |
| Music streaming data (Spotify, Pandora, etc.)        | 48%                                                | 30% | 22%                             | 158       | 50%                                                | 23% | 27%                             | 204       | 41%                                                | 26% | 32%                             | 34        |
| Yelp reviews and ratings                             | 37%                                                | 17% | 46%                             | 156       | 28%                                                | 18% | 54%                             | 204       | 24%                                                | 26% | 50%                             | 34        |
| Ride-sharing history (Uber, Lyft, etc.)              | 24%                                                | 31% | 46%                             | 157       | 27%                                                | 27% | 45%                             | 204       | 12%                                                | 29% | 59%                             | 34        |

|                                                                   |     |     |     |     |     |     |     |     |     |     |     |    |
|-------------------------------------------------------------------|-----|-----|-----|-----|-----|-----|-----|-----|-----|-----|-----|----|
| <b>Fitness tracker data<br/>(FitBit, Apple Watch,<br/>etc.)</b>   | 48% | 16% | 35% | 158 | 43% | 16% | 42% | 204 | 44% | 26% | 29% | 34 |
| <b>Tax records and<br/>income history</b>                         | 19% | 76% | 4%  | 157 | 20% | 76% | 3%  | 204 | 12% | 88% | 0%  | 34 |
| <b>Credit card statement<br/>data</b>                             | 19% | 75% | 6%  | 157 | 19% | 75% | 6%  | 204 | 12% | 85% | 3%  | 34 |
| <b>Voting history</b>                                             | 44% | 52% | 4%  | 155 | 51% | 45% | 4%  | 203 | 35% | 65% | 0%  | 34 |
| <b>Prescription history<br/>(CVS, Walgreen's, etc.)</b>           | 50% | 48% | 2%  | 157 | 53% | 44% | 3%  | 204 | 35% | 65% | 0%  | 34 |
| <b>Electronic medical<br/>record data</b>                         | 45% | 54% | 1%  | 157 | 46% | 51% | 2%  | 202 | 38% | 62% | 0%  | 34 |
| <b>Geolocation (GPS<br/>from your phone or<br/>computer) data</b> | 40% | 56% | 4%  | 158 | 37% | 58% | 5%  | 203 | 35% | 62% | 3%  | 34 |
| <b>Genetic data<br/>(23andMe, etc.)</b>                           | 36% | 35% | 28% | 158 | 33% | 35% | 32% | 203 | 24% | 38% | 38% | 34 |

**Table S3.** Participants' willingness to donate data sources who have had an unpleasant experience as a result of information given out online.

| Data Source                                          | Yes                                                |     |                                 |           | No                                                 |     |                                 |           | Unsure                                             |     |                                 |           |
|------------------------------------------------------|----------------------------------------------------|-----|---------------------------------|-----------|----------------------------------------------------|-----|---------------------------------|-----------|----------------------------------------------------|-----|---------------------------------|-----------|
|                                                      | Willingness to share data sources with researchers |     |                                 |           | Willingness to share data sources with researchers |     |                                 |           | Willingness to share data sources with researchers |     |                                 |           |
|                                                      | Yes                                                | No  | I don't use this source of data | Total (n) | Yes                                                | No  | I don't use this source of data | Total (n) | Yes                                                | No  | I don't use this source of data | Total (n) |
| Facebook data                                        | 50%                                                | 28% | 22%                             | 108       | 43%                                                | 32% | 26%                             | 250       | 47%                                                | 24% | 29%                             | 38        |
| Twitter data                                         | 20%                                                | 17% | 64%                             | 107       | 22%                                                | 13% | 65%                             | 249       | 24%                                                | 13% | 63%                             | 38        |
| Instagram data                                       | 40%                                                | 22% | 38%                             | 108       | 29%                                                | 21% | 50%                             | 248       | 22%                                                | 22% | 57%                             | 37        |
| Snapchat data                                        | 13%                                                | 24% | 63%                             | 107       | 12%                                                | 16% | 73%                             | 250       | 8%                                                 | 18% | 74%                             | 38        |
| Email History (Gmail, Yahoo, Comcast, Verizon, etc.) | 38%                                                | 61% | 1%                              | 108       | 31%                                                | 69% | 1%                              | 248       | 29%                                                | 66% | 5%                              | 38        |
| Text Message and Phone Call Data                     | 31%                                                | 69% | 1%                              | 108       | 29%                                                | 68% | 3%                              | 250       | 29%                                                | 71% | 0%                              | 38        |
| Google search history                                | 45%                                                | 54% | 1%                              | 108       | 42%                                                | 57% | 0%                              | 249       | 37%                                                | 63% | 0%                              | 38        |
| Online purchase history (Amazon, Target, Ebay, etc.) | 49%                                                | 50% | 1%                              | 108       | 45%                                                | 53% | 2%                              | 249       | 45%                                                | 55% | 0%                              | 38        |
| Music streaming data (Spotify, Pandora, etc.)        | 53%                                                | 24% | 23%                             | 108       | 47%                                                | 27% | 26%                             | 250       | 47%                                                | 26% | 26%                             | 38        |
| Yelp reviews and ratings                             | 35%                                                | 18% | 47%                             | 108       | 31%                                                | 17% | 52%                             | 249       | 24%                                                | 27% | 49%                             | 37        |
| Ride-sharing history (Uber, Lyft, etc.)              | 26%                                                | 30% | 44%                             | 108       | 25%                                                | 30% | 45%                             | 249       | 18%                                                | 21% | 61%                             | 38        |

|                                                                   |     |     |     |     |     |     |     |     |     |     |     |    |
|-------------------------------------------------------------------|-----|-----|-----|-----|-----|-----|-----|-----|-----|-----|-----|----|
| <b>Fitness tracker data<br/>(FitBit, Apple Watch,<br/>etc.)</b>   | 50% | 14% | 36% | 108 | 42% | 17% | 40% | 250 | 47% | 24% | 29% | 38 |
| <b>Tax records and income<br/>history</b>                         | 19% | 78% | 3%  | 108 | 20% | 77% | 4%  | 249 | 13% | 82% | 5%  | 38 |
| <b>Credit card statement<br/>data</b>                             | 19% | 75% | 6%  | 108 | 20% | 76% | 5%  | 249 | 11% | 79% | 11% | 38 |
| <b>Voting history</b>                                             | 48% | 48% | 4%  | 108 | 48% | 49% | 4%  | 246 | 39% | 58% | 3%  | 38 |
| <b>Prescription history<br/>(CVS, Walgreen's, etc.)</b>           | 52% | 45% | 3%  | 108 | 51% | 47% | 2%  | 249 | 42% | 58% | 0%  | 38 |
| <b>Electronic medical<br/>record data</b>                         | 45% | 54% | 1%  | 108 | 45% | 53% | 2%  | 247 | 42% | 58% | 0%  | 38 |
| <b>Geolocation (GPS from<br/>your phone or<br/>computer) data</b> | 43% | 55% | 3%  | 108 | 36% | 58% | 6%  | 249 | 39% | 58% | 3%  | 38 |
| <b>Genetic data<br/>(23andMe, etc.)</b>                           | 33% | 38% | 29% | 108 | 34% | 34% | 32% | 249 | 32% | 37% | 32% | 38 |

**Table S4.** Participants' willingness to donate data sources whose reputation was negatively affected as a result of information posted online.

| Reputation was negatively affected as a result of information posted online | Yes                                                |     |                                 |           | No                                                 |     |                                 |           | Unsure                                             |     |                                 |           |
|-----------------------------------------------------------------------------|----------------------------------------------------|-----|---------------------------------|-----------|----------------------------------------------------|-----|---------------------------------|-----------|----------------------------------------------------|-----|---------------------------------|-----------|
|                                                                             | Willingness to share data sources with researchers |     |                                 |           | Willingness to share data sources with researchers |     |                                 |           | Willingness to share data sources with researchers |     |                                 |           |
| Data Source                                                                 | Yes                                                | No  | I don't use this source of data | Total (n) | Yes                                                | No  | I don't use this source of data | Total (n) | Yes                                                | No  | I don't use this source of data | Total (n) |
| Facebook data                                                               | 54%                                                | 23% | 23%                             | 35        | 44%                                                | 30% | 26%                             | 296       | 47%                                                | 31% | 22%                             | 64        |
| Twitter data                                                                | 26%                                                | 6%  | 68%                             | 34        | 21%                                                | 13% | 67%                             | 296       | 24%                                                | 24% | 52%                             | 63        |
| Instagram data                                                              | 34%                                                | 11% | 54%                             | 35        | 30%                                                | 22% | 48%                             | 293       | 34%                                                | 25% | 41%                             | 64        |
| Snapchat data                                                               | 11%                                                | 11% | 77%                             | 35        | 12%                                                | 17% | 71%                             | 296       | 11%                                                | 29% | 60%                             | 63        |
| Email History (Gmail, Yahoo, Comcast, Verizon, etc.)                        | 43%                                                | 57% | 0%                              | 35        | 32%                                                | 67% | 1%                              | 294       | 31%                                                | 67% | 2%                              | 64        |
| Text Message and Phone Call Data                                            | 29%                                                | 71% | 0%                              | 35        | 29%                                                | 68% | 3%                              | 296       | 31%                                                | 67% | 2%                              | 64        |
| Google search history                                                       | 49%                                                | 51% | 0%                              | 35        | 42%                                                | 58% | 1%                              | 295       | 44%                                                | 56% | 0%                              | 64        |
| Online purchase history (Amazon, Target, Ebay, etc.)                        | 63%                                                | 37% | 0%                              | 35        | 46%                                                | 53% | 2%                              | 296       | 40%                                                | 60% | 0%                              | 63        |
| Music streaming data (Spotify, Pandora, etc.)                               | 51%                                                | 14% | 34%                             | 35        | 48%                                                | 28% | 25%                             | 296       | 52%                                                | 25% | 23%                             | 64        |
| Yelp reviews and ratings                                                    | 31%                                                | 9%  | 60%                             | 35        | 30%                                                | 19% | 51%                             | 294       | 36%                                                | 19% | 45%                             | 64        |
| Ride-sharing history (Uber, Lyft, etc.)                                     | 26%                                                | 17% | 57%                             | 35        | 26%                                                | 30% | 43%                             | 295       | 14%                                                | 30% | 56%                             | 64        |

|                                                                   |     |     |     |    |     |     |     |     |     |     |     |    |
|-------------------------------------------------------------------|-----|-----|-----|----|-----|-----|-----|-----|-----|-----|-----|----|
| <b>Fitness tracker data<br/>(FitBit, Apple Watch,<br/>etc.)</b>   | 51% | 3%  | 46% | 35 | 43% | 18% | 40% | 296 | 50% | 22% | 28% | 64 |
| <b>Tax records and income<br/>history</b>                         | 20% | 77% | 3%  | 35 | 20% | 77% | 4%  | 295 | 16% | 81% | 3%  | 64 |
| <b>Credit card statement<br/>data</b>                             | 23% | 74% | 3%  | 35 | 19% | 75% | 6%  | 295 | 14% | 81% | 5%  | 64 |
| <b>Voting history</b>                                             | 43% | 51% | 6%  | 35 | 49% | 47% | 4%  | 293 | 40% | 59% | 2%  | 63 |
| <b>Prescription history<br/>(CVS, Walgreen's, etc.)</b>           | 63% | 34% | 3%  | 35 | 50% | 48% | 2%  | 295 | 45% | 52% | 3%  | 64 |
| <b>Electronic medical<br/>record data</b>                         | 60% | 40% | 0%  | 35 | 44% | 54% | 2%  | 293 | 41% | 59% | 0%  | 64 |
| <b>Geolocation (GPS from<br/>your phone or<br/>computer) data</b> | 51% | 46% | 3%  | 35 | 38% | 57% | 5%  | 295 | 33% | 63% | 5%  | 64 |
| <b>Genetic data (23andMe,<br/>etc.)</b>                           | 46% | 20% | 34% | 35 | 32% | 37% | 32% | 295 | 36% | 38% | 27% | 64 |

**Table S5.** Participants' willingness to donate data sources whose privacy of personal information was violated.

| Privacy of personal information was violated         | Yes                                                |     |                                 |           | No                                                 |     |                                 |           | Unsure                                             |     |                                 |           |
|------------------------------------------------------|----------------------------------------------------|-----|---------------------------------|-----------|----------------------------------------------------|-----|---------------------------------|-----------|----------------------------------------------------|-----|---------------------------------|-----------|
|                                                      | Willingness to share data sources with researchers |     |                                 |           | Willingness to share data sources with researchers |     |                                 |           | Willingness to share data sources with researchers |     |                                 |           |
| Data Source                                          | Yes                                                | No  | I don't use this source of data | Total (n) | Yes                                                | No  | I don't use this source of data | Total (n) | Yes                                                | No  | I don't use this source of data | Total (n) |
| Facebook data                                        | 42%                                                | 31% | 27%                             | 194       | 48%                                                | 29% | 23%                             | 131       | 49%                                                | 27% | 24%                             | 74        |
| Twitter data                                         | 21%                                                | 15% | 64%                             | 194       | 24%                                                | 16% | 60%                             | 129       | 20%                                                | 7%  | 73%                             | 74        |
| Instagram data                                       | 31%                                                | 24% | 45%                             | 194       | 33%                                                | 19% | 48%                             | 129       | 38%                                                | 13% | 49%                             | 53        |
| Snapchat data                                        | 12%                                                | 19% | 68%                             | 193       | 12%                                                | 20% | 68%                             | 131       | 13%                                                | 13% | 75%                             | 55        |
| Email History (Gmail, Yahoo, Comcast, Verizon, etc.) | 31%                                                | 68% | 1%                              | 194       | 33%                                                | 64% | 3%                              | 130       | 35%                                                | 65% | 0%                              | 54        |
| Text Message and Phone Call Data                     | 30%                                                | 69% | 2%                              | 194       | 30%                                                | 66% | 4%                              | 131       | 31%                                                | 67% | 2%                              | 55        |
| Google search history                                | 43%                                                | 56% | 1%                              | 193       | 44%                                                | 56% | 0%                              | 131       | 41%                                                | 57% | 2%                              | 54        |
| Online purchase history (Amazon, Target, Ebay, etc.) | 43%                                                | 55% | 2%                              | 194       | 49%                                                | 50% | 1%                              | 130       | 49%                                                | 51% | 0%                              | 74        |
| Music streaming data (Spotify, Pandora, etc.)        | 47%                                                | 30% | 23%                             | 194       | 49%                                                | 24% | 27%                             | 131       | 51%                                                | 20% | 28%                             | 74        |
| Yelp reviews and ratings                             | 35%                                                | 22% | 43%                             | 193       | 30%                                                | 15% | 56%                             | 131       | 26%                                                | 14% | 60%                             | 73        |
| Ride-sharing history (Uber, Lyft, etc.)              | 22%                                                | 30% | 48%                             | 194       | 28%                                                | 31% | 41%                             | 130       | 24%                                                | 23% | 53%                             | 74        |

|                                                                   |     |     |     |     |     |     |     |     |     |     |     |    |
|-------------------------------------------------------------------|-----|-----|-----|-----|-----|-----|-----|-----|-----|-----|-----|----|
| <b>Fitness tracker data<br/>(FitBit, Apple Watch,<br/>etc.)</b>   | 48% | 20% | 31% | 194 | 44% | 16% | 40% | 131 | 39% | 9%  | 51% | 74 |
| <b>Tax records and income<br/>history</b>                         | 21% | 77% | 2%  | 194 | 18% | 78% | 5%  | 130 | 19% | 76% | 5%  | 74 |
| <b>Credit card statement<br/>data</b>                             | 17% | 77% | 6%  | 193 | 19% | 76% | 5%  | 131 | 23% | 70% | 7%  | 74 |
| <b>Voting history</b>                                             | 46% | 50% | 4%  | 193 | 46% | 51% | 3%  | 128 | 51% | 46% | 3%  | 74 |
| <b>Prescription history<br/>(CVS, Walgreen's, etc.)</b>           | 47% | 51% | 2%  | 193 | 53% | 44% | 2%  | 131 | 54% | 43% | 3%  | 74 |
| <b>Electronic medical<br/>record data</b>                         | 43% | 56% | 1%  | 193 | 45% | 51% | 4%  | 130 | 49% | 49% | 1%  | 73 |
| <b>Geolocation (GPS from<br/>your phone or<br/>computer) data</b> | 38% | 59% | 3%  | 194 | 39% | 56% | 5%  | 130 | 39% | 53% | 8%  | 74 |
| <b>Genetic data (23andMe,<br/>etc.)</b>                           | 32% | 35% | 34% | 194 | 38% | 37% | 25% | 130 | 32% | 34% | 34% | 74 |



**Table S6.** Participants' willingness to donate data sources whose account accessed by someone without permission.

| Account accessed by someone without permission       |                                                    |     |                                 |           |                                                    |     |                                 |           |                                                    |     |                                 |           |
|------------------------------------------------------|----------------------------------------------------|-----|---------------------------------|-----------|----------------------------------------------------|-----|---------------------------------|-----------|----------------------------------------------------|-----|---------------------------------|-----------|
| Data Source                                          | Yes                                                |     |                                 |           | No                                                 |     |                                 |           | Unsure                                             |     |                                 |           |
|                                                      | Willingness to share data sources with researchers |     |                                 |           | Willingness to share data sources with researchers |     |                                 |           | Willingness to share data sources with researchers |     |                                 |           |
|                                                      | Yes                                                | No  | I don't use this source of data | Total (n) | Yes                                                | No  | I don't use this source of data | Total (n) | Yes                                                | No  | I don't use this source of data | Total (n) |
| Facebook data                                        | 46%                                                | 27% | 27%                             | 193       | 46%                                                | 32% | 22%                             | 128       | 45%                                                | 31% | 24%                             | 55        |
| Twitter data                                         | 26%                                                | 11% | 63%                             | 192       | 17%                                                | 15% | 68%                             | 127       | 22%                                                | 18% | 60%                             | 55        |
| Instagram data                                       | 35%                                                | 21% | 44%                             | 191       | 29%                                                | 23% | 48%                             | 128       | 30%                                                | 19% | 52%                             | 54        |
| Snapchat data                                        | 13%                                                | 16% | 71%                             | 192       | 12%                                                | 20% | 69%                             | 128       | 11%                                                | 22% | 67%                             | 55        |
| Email History (Gmail, Yahoo, Comcast, Verizon, etc.) | 33%                                                | 65% | 2%                              | 192       | 32%                                                | 67% | 1%                              | 128       | 31%                                                | 67% | 2%                              | 54        |
| Text Message and Phone Call Data                     | 32%                                                | 65% | 3%                              | 193       | 28%                                                | 70% | 2%                              | 128       | 29%                                                | 69% | 2%                              | 55        |
| Google search history                                | 42%                                                | 58% | 0%                              | 192       | 44%                                                | 55% | 1%                              | 128       | 45%                                                | 53% | 2%                              | 55        |
| Online purchase history (Amazon, Target, Ebay, etc.) | 45%                                                | 53% | 2%                              | 192       | 46%                                                | 53% | 1%                              | 128       | 56%                                                | 44% | 0%                              | 55        |
| Music streaming data (Spotify, Pandora, etc.)        | 49%                                                | 30% | 22%                             | 193       | 47%                                                | 23% | 30%                             | 128       | 51%                                                | 22% | 27%                             | 55        |
| Yelp reviews and ratings                             | 30%                                                | 21% | 48%                             | 192       | 29%                                                | 16% | 55%                             | 127       | 40%                                                | 11% | 49%                             | 55        |
| Ride-sharing history (Uber, Lyft, etc.)              | 25%                                                | 31% | 44%                             | 192       | 25%                                                | 28% | 47%                             | 128       | 25%                                                | 24% | 51%                             | 55        |

|                                                                   |     |     |     |     |     |     |     |     |     |     |     |    |
|-------------------------------------------------------------------|-----|-----|-----|-----|-----|-----|-----|-----|-----|-----|-----|----|
| <b>Fitness tracker data<br/>(FitBit, Apple Watch,<br/>etc.)</b>   | 45% | 15% | 40% | 193 | 45% | 19% | 36% | 128 | 47% | 20% | 33% | 55 |
| <b>Tax records and income<br/>history</b>                         | 22% | 75% | 3%  | 192 | 17% | 77% | 5%  | 128 | 15% | 84% | 2%  | 55 |
| <b>Credit card statement<br/>data</b>                             | 20% | 73% | 7%  | 192 | 19% | 77% | 4%  | 128 | 15% | 78% | 7%  | 55 |
| <b>Voting history</b>                                             | 47% | 49% | 4%  | 190 | 51% | 46% | 3%  | 127 | 38% | 58% | 4%  | 55 |
| <b>Prescription history<br/>(CVS, Walgreen's, etc.)</b>           | 51% | 46% | 3%  | 192 | 50% | 48% | 2%  | 128 | 53% | 44% | 4%  | 55 |
| <b>Electronic medical<br/>record data</b>                         | 47% | 51% | 2%  | 192 | 44% | 55% | 2%  | 126 | 42% | 56% | 2%  | 55 |
| <b>Geolocation (GPS from<br/>your phone or<br/>computer) data</b> | 42% | 54% | 4%  | 193 | 30% | 65% | 6%  | 127 | 42% | 51% | 7%  | 55 |
| <b>Genetic data<br/>(23andMe, etc.)</b>                           | 36% | 35% | 29% | 193 | 31% | 39% | 29% | 127 | 33% | 29% | 38% | 55 |
