# Supplementary material for: A Survey of Research Participants’ Privacy-Related Experiences and Willingness to Share Real-World Data with Researchers
Source: MDPI journal article supplement (doi:10.3390/jpm12111922), 2022-11-17
Supplement: s1 [file s1]

**Table S11.** Associations between willingness to share real-world data from various sources and experienced account being accessed without permission, adjusted for age range and education level.

| Real-World Data Source                               | Logistic regression results |                         |        |          |
|------------------------------------------------------|-----------------------------|-------------------------|--------|----------|
| Social Media Data                                    |                             |                         |        |          |
| Facebook data (n= 253)                               | Adjusted Odds Ratio         | 95% confidence interval |        | P-Value  |
| Account accessed without permission                  | 1.051                       | 0.607                   | 1.819  | 0.8601   |
| Age range (ref = over 60)                            |                             |                         |        |          |
| 18 to 30                                             | 1.412                       | 0.636                   | 3.134  | 0.3235   |
| 31 to 40                                             | 0.816                       | 0.38                    | 1.751  | 0.303    |
| 41 to 50                                             | 0.633                       | 0.276                   | 1.452  | 0.0764*  |
| 51 to 60                                             | 1.924                       | 0.852                   | 4.347  | 0.0428** |
| Education (ref = Doctorate or other terminal degree) |                             |                         |        |          |
| High school                                          | 4.58                        | 0.432                   | 48.507 | 0.2256   |
| Some College/Associates/Trade School                 | 1.449                       | 0.502                   | 4.183  | 0.8476   |
| Bachelors                                            | 1.475                       | 0.526                   | 4.14   | 0.884    |
| Masters                                              | 0.898                       | 0.318                   | 2.53   | 0.0849*  |
| Twitter data (n= 123)                                | Adjusted Odds Ratio         | 95% confidence interval |        | P-Value  |
| Account accessed without permission                  | 1.99                        | 0.839                   | 4.72   | 0.6351   |
| Age range (ref = over 60)                            |                             |                         |        |          |
| 18 to 30                                             | 6.665                       | 1.75                    | 25.381 | 0.1182   |
| 31 to 40                                             | 1.938                       | 0.612                   | 6.134  | 0.0256** |
| 41 to 50                                             | 1.13                        | 0.315                   | 4.062  | 0.5996   |
| 51 to 60                                             | 5.01                        | 1.327                   | 18.918 | 0.0981*  |
| Education (ref = Doctorate or other terminal degree) |                             |                         |        |          |
| High school                                          | 0.738                       | 0.044                   | 12.464 | 0.1051   |
| Some College/Associates/Trade School                 | 0.252                       | 0.051                   | 1.25   | 0.7781   |
| Bachelors                                            | 0.657                       | 0.141                   | 3.053  | 0.0878*  |
| Masters                                              | 0.417                       | 0.086                   | 2.009  | 0.6772   |
| Instagram data (n= 183)                              | Adjusted Odds Ratio         | 95% confidence interval |        | P-Value  |
| Account accessed without permission                  | 1.023                       | 0.528                   | 1.983  | 0.9454   |
| Age range (ref = over 60)                            |                             |                         |        |          |
| 18 to 30                                             | 2.352                       | 0.915                   | 6.044  | 0.3159   |

|                                                      |                            |                                |                |          |
|------------------------------------------------------|----------------------------|--------------------------------|----------------|----------|
| 31 to 40                                             | 1.583                      | 0.618                          | 4.057          | 0.7211   |
| 41 to 50                                             | 1.934                      | 0.677                          | 5.525          | 0.7748   |
| 51 to 60                                             | 2.298                      | 0.77                           | 6.857          | 0.4598   |
| Education (ref = Doctorate or other terminal degree) |                            |                                |                |          |
| High school                                          | 2.72                       | 0.22                           | 33.615         | 0.4982   |
| Some College/Associates/Trade School                 | 1.409                      | 0.419                          | 4.743          | 0.9697   |
| Bachelors                                            | 1.658                      | 0.517                          | 5.321          | 0.6671   |
| Masters                                              | 0.939                      | 0.287                          | 3.068          | 0.2334   |
| <b>Snapshot data (n= 107)</b>                        | <b>Adjusted Odds Ratio</b> | <b>95% confidence interval</b> | <b>P-Value</b> |          |
| Account accessed without permission                  | -                          | -                              | -              | -        |
| Age range (ref = over 60)                            |                            |                                |                |          |
| 18 to 30                                             | -                          | -                              | -              | -        |
| 31 to 40                                             | -                          | -                              | -              | -        |
| 41 to 50                                             | -                          | -                              | -              | -        |
| 51 to 60                                             | 1.784                      | 0.07                           | 45.577         | 0.976    |
| Education (ref = Doctorate or other terminal degree) |                            |                                |                |          |
| High school                                          | 0.298                      | 0.051                          | 1.73           | 0.5663   |
| Some College/Associates/Trade School                 | 0.94                       | 0.19                           | 4.644          | 0.0471** |
| Bachelors                                            | 1.145                      | 0.209                          | 6.267          | 0.9131   |
| Masters                                              | -                          | -                              | -              | -        |
| <b>Yelp reviews and ratings data (n= 173)</b>        | <b>Adjusted Odds Ratio</b> | <b>95% confidence interval</b> | <b>P-Value</b> |          |
| Account accessed without permission                  | 0.945                      | 0.476                          | 1.879          | 0.8727   |
| Age range (ref = over 60)                            |                            |                                |                |          |
| 18 to 30                                             | 1.948                      | 0.69                           | 5.494          | 0.912    |
| 31 to 40                                             | 1.629                      | 0.642                          | 4.132          | 0.69     |
| 41 to 50                                             | 2.228                      | 0.86                           | 5.774          | 0.6196   |
| 51 to 60                                             | 3.203                      | 1.147                          | 8.942          | 0.1636   |
| Education (ref = Doctorate or other terminal degree) |                            |                                |                |          |
| High school                                          | -                          | -                              | -              | -        |
| Some College/Associates/Trade School                 | 0.698                      | 0.2                            | 2.428          | 0.9632   |
| Bachelors                                            | 1.011                      | 0.292                          | 3.496          | 0.9686   |
| Masters                                              | 0.911                      | 0.263                          | 3.156          | 0.9671   |
| <b>Health Data</b>                                   |                            |                                |                |          |

| <b><i>Fitness tracker data (n= 214)</i></b>           | <b><i>Adjusted Odds Ratio</i></b> | <b><i>95% confidence interval</i></b> |        | <b><i>P-Value</i></b> |
|-------------------------------------------------------|-----------------------------------|---------------------------------------|--------|-----------------------|
| Account accessed without permission                   | 1.607                             | 0.835                                 | 3.091  | 0.1554                |
| Age range (ref = over 60)                             |                                   |                                       |        |                       |
| 18 to 30                                              | 3.549                             | 1.165                                 | 10.805 | 0.1025*               |
| 31 to 40                                              | 1.275                             | 0.549                                 | 2.964  | 0.2866                |
| 41 to 50                                              | 1.357                             | 0.536                                 | 3.434  | 0.4423                |
| 51 to 60                                              | 2.871                             | 1.016                                 | 8.112  | 0.2228                |
| Education (ref = Doctorate or other terminal degree)  |                                   |                                       |        |                       |
| High school                                           | 0.8                               | 0.102                                 | 6.273  | 0.7199                |
| Some College/Associates/Trade School                  | 1.034                             | 0.355                                 | 3.012  | 0.952                 |
| Bachelors                                             | 1.5                               | 0.511                                 | 4.399  | 0.3096                |
| Masters                                               | 1.057                             | 0.377                                 | 2.965  | 0.996                 |
| <b><i>Prescription history data (n= 334)</i></b>      | <b><i>Adjusted Odds Ratio</i></b> | <b><i>95% confidence interval</i></b> |        | <b><i>P-Value</i></b> |
| Account accessed without permission                   | 1.052                             | 0.665                                 | 1.665  | 0.8286                |
| Age range (ref = over 60)                             |                                   |                                       |        |                       |
| 18 to 30                                              | 1.234                             | 0.627                                 | 2.43   | 0.1*                  |
| 31 to 40                                              | 0.823                             | 0.436                                 | 1.553  | 0.9914                |
| 41 to 50                                              | 0.436                             | 0.207                                 | 0.916  | 0.0219**              |
| 51 to 60                                              | 0.842                             | 0.444                                 | 1.597  | 0.9119                |
| Education (ref = Doctorate or other terminal degree)  |                                   |                                       |        |                       |
| High school                                           | 0.924                             | 0.197                                 | 4.34   | 0.843                 |
| Some College/Associates/Trade School                  | 1.238                             | 0.512                                 | 2.993  | 0.4598                |
| Bachelors                                             | 1.368                             | 0.58                                  | 3.226  | 0.2216                |
| Masters                                               | 0.749                             | 0.314                                 | 1.789  | 0.1787                |
| <b><i>Electronic medical record data (n= 336)</i></b> | <b><i>Adjusted Odds Ratio</i></b> | <b><i>95% confidence interval</i></b> |        | <b><i>P-Value</i></b> |
| Account accessed without permission                   | 1.125                             | 0.71                                  | 1.783  | 0.6152                |
| Age range (ref = over 60)                             |                                   |                                       |        |                       |
| 18 to 30                                              | 0.514                             | 0.263                                 | 1.004  | 0.5254                |
| 31 to 40                                              | 0.645                             | 0.341                                 | 1.22   | 0.748                 |
| 41 to 50                                              | 0.436                             | 0.21                                  | 0.905  | 0.2373                |
| 51 to 60                                              | 0.535                             | 0.28                                  | 1.024  | 0.6307                |
| Education (ref = Doctorate or other terminal degree)  |                                   |                                       |        |                       |
| High school                                           | 0.705                             | 0.137                                 | 3.625  | 0.8389                |

|                                                      |                            |                                |        |                |
|------------------------------------------------------|----------------------------|--------------------------------|--------|----------------|
| Some College/Associates/Trade School                 | 0.733                      | 0.306                          | 1.752  | 0.7394         |
| Bachelors                                            | 1.004                      | 0.432                          | 2.332  | 0.3252         |
| Masters                                              | 0.619                      | 0.262                          | 1.466  | 0.3064         |
| <b>Genetic data (n= 239)</b>                         | <b>Adjusted Odds Ratio</b> | <b>95% confidence interval</b> |        | <b>P-Value</b> |
| Account accessed without permission                  | 1.578                      | 0.916                          | 2.716  | 0.0999*        |
| Age range (ref = over 60)                            |                            |                                |        |                |
| 18 to 30                                             | 0.596                      | 0.267                          | 1.328  | 0.6417         |
| 31 to 40                                             | 0.635                      | 0.284                          | 1.418  | 0.8028         |
| 41 to 50                                             | 0.494                      | 0.218                          | 1.115  | 0.2781         |
| 51 to 60                                             | 0.795                      | 0.367                          | 1.725  | 0.586          |
| Education (ref = Doctorate or other terminal degree) |                            |                                |        |                |
| High school                                          | 0.469                      | 0.072                          | 3.062  | 0.4191         |
| Some College/Associates/Trade School                 | 1.123                      | 0.414                          | 3.048  | 0.2945         |
| Bachelors                                            | 1.156                      | 0.443                          | 3.016  | 0.2212         |
| Masters                                              | 0.622                      | 0.231                          | 1.678  | 0.3409         |
| <b>Direct Communication Data</b>                     |                            |                                |        |                |
| <b>Text message and phone data (n= 335)</b>          | <b>Adjusted Odds Ratio</b> | <b>95% confidence interval</b> |        | <b>P-Value</b> |
| Account accessed without permission                  | 1.577                      | 0.944                          | 2.634  | 0.0819*        |
| Age range (ref = over 60)                            |                            |                                |        |                |
| 18 to 30                                             | 1.019                      | 0.492                          | 2.11   | 0.7988         |
| 31 to 40                                             | 1.181                      | 0.599                          | 2.33   | 0.3721         |
| 41 to 50                                             | 0.628                      | 0.27                           | 1.461  | 0.182          |
| 51 to 60                                             | 1.04                       | 0.519                          | 2.084  | 0.7244         |
| Education (ref = Doctorate or other terminal degree) |                            |                                |        |                |
| High school                                          | 2.263                      | 0.447                          | 11.457 | 0.1971         |
| Some College/Associates/Trade School                 | 1.091                      | 0.429                          | 2.776  | 0.918          |
| Bachelors                                            | 0.897                      | 0.36                           | 2.236  | 0.4862         |
| Masters                                              | 0.612                      | 0.237                          | 1.581  | 0.0379**       |
| <b>Email history data (n= 337)</b>                   | <b>Adjusted Odds Ratio</b> | <b>95% confidence interval</b> |        | <b>P-Value</b> |
| Account accessed without permission                  | 1.261                      | 0.767                          | 2.074  | 0.3601         |
| Age range (ref = over 60)                            |                            |                                |        |                |
| 18 to 30                                             | 0.79                       | 0.386                          | 1.617  | 0.7687         |
| 31 to 40                                             | 0.824                      | 0.414                          | 1.639  | 0.8901         |

|                                                      |                            |                                |        |                |
|------------------------------------------------------|----------------------------|--------------------------------|--------|----------------|
| 41 to 50                                             | 0.573                      | 0.253                          | 1.297  | 0.1915         |
| 51 to 60                                             | 1.21                       | 0.62                           | 2.359  | 0.1461         |
| Education                                            |                            |                                |        |                |
| High school                                          | 3.625                      | 0.747                          | 17.594 | 0.1105         |
| Some College/Associates/Trade School                 | 1.919                      | 0.756                          | 4.874  | 0.2933         |
| Bachelors                                            | 1.414                      | 0.566                          | 3.533  | 0.8564         |
| Masters                                              | 0.713                      | 0.271                          | 1.873  | 0.0064**       |
| <b>Online Browsing or Streaming Data</b>             |                            |                                |        |                |
| <b>Music streaming data (n= 261)</b>                 | <b>Adjusted Odds Ratio</b> | <b>95% confidence interval</b> |        | <b>P-Value</b> |
| Account accessed without permission                  | 1.492                      | 0.846                          | 2.628  | 0.1666         |
| Age range (ref = over 60)                            |                            |                                |        |                |
| 18 to 30                                             | 7.393                      | 2.993                          | 18.259 | 0.0032**       |
| 31 to 40                                             | 2.744                      | 1.283                          | 5.868  | 0.8879         |
| 41 to 50                                             | 2.138                      | 0.931                          | 4.91   | 0.3355         |
| 51 to 60                                             | 4.31                       | 1.795                          | 10.35  | 0.1807         |
| Education (ref = Doctorate or other terminal degree) |                            |                                |        |                |
| High school                                          | 1.163                      | 0.165                          | 8.187  | 0.9728         |
| Some College/Associates/Trade School                 | 1.386                      | 0.494                          | 3.888  | 0.5265         |
| Bachelors                                            | 1.002                      | 0.377                          | 2.666  | 0.665          |
| Masters                                              | 1.166                      | 0.426                          | 3.192  | 0.9288         |
| <b>Google search history data (n= 340)</b>           | <b>Adjusted Odds Ratio</b> | <b>95% confidence interval</b> |        | <b>P-Value</b> |
| Account accessed without permission                  | 1.468                      | 0.92                           | 2.342  | 0.1072         |
| Age range (ref = over 60)                            |                            |                                |        |                |
| 18 to 30                                             | 0.909                      | 0.462                          | 1.788  | 0.8183         |
| 31 to 40                                             | 0.945                      | 0.497                          | 1.798  | 0.942          |
| 41 to 50                                             | 0.595                      | 0.282                          | 1.258  | 0.0831*        |
| 51 to 60                                             | 1.607                      | 0.841                          | 3.07   | 0.0277**       |
| Education (ref = Doctorate or other terminal degree) |                            |                                |        |                |
| High school                                          | 2.834                      | 0.565                          | 14.214 | 0.1325         |
| Some College/Associates/Trade School                 | 1.337                      | 0.561                          | 3.185  | 0.5736         |
| Bachelors                                            | 0.775                      | 0.333                          | 1.8    | 0.0855*        |
| Masters                                              | 0.719                      | 0.304                          | 1.697  | 0.0504**       |

| <b>Financial Data</b>                                |                            |                                |        |                |
|------------------------------------------------------|----------------------------|--------------------------------|--------|----------------|
| <b>Online purchase history data (n= 337)</b>         | <b>Adjusted Odds Ratio</b> | <b>95% confidence interval</b> |        | <b>P-Value</b> |
| Account accessed without permission                  | 1.279                      | 0.807                          | 2.027  | 0.2951         |
| Age range (ref = over 60)                            |                            |                                |        |                |
| 18 to 30                                             | 1.488                      | 0.765                          | 2.894  | 0.3919         |
| 31 to 40                                             | 1.282                      | 0.68                           | 2.418  | 0.8033         |
| 41 to 50                                             | 0.749                      | 0.357                          | 1.571  | 0.077*         |
| 51 to 60                                             | 1.833                      | 0.955                          | 3.519  | 0.0774*        |
| Education (ref = Doctorate or other terminal degree) |                            |                                |        |                |
| High school                                          | 2.953                      | 0.493                          | 17.685 | 0.1464         |
| Some College/Associates/Trade School                 | 1.034                      | 0.432                          | 2.478  | 0.7786         |
| Bachelors                                            | 0.825                      | 0.355                          | 1.921  | 0.2219         |
| Masters                                              | 0.679                      | 0.286                          | 1.615  | 0.0551*        |
| <b>Tax records and income history data (n= 331)</b>  | <b>Adjusted Odds Ratio</b> | <b>95% confidence interval</b> |        | <b>P-Value</b> |
| Account accessed without permission                  | 2.132                      | 1.15                           | 3.951  | 0.0162**       |
| Age range (ref = over 60)                            |                            |                                |        |                |
| 18 to 30                                             | 1.006                      | 0.437                          | 2.316  | 0.8981         |
| 31 to 40                                             | 1.521                      | 0.721                          | 3.208  | 0.0815*        |
| 41 to 50                                             | 0.807                      | 0.32                           | 2.038  | 0.595          |
| 51 to 60                                             | 0.688                      | 0.289                          | 1.638  | 0.2764         |
| Education (ref = Doctorate or other terminal degree) |                            |                                |        |                |
| High school                                          | 2.242                      | 0.318                          | 15.812 | 0.3081         |
| Some College/Associates/Trade School                 | 0.939                      | 0.338                          | 2.609  | 0.6751         |
| Bachelors                                            | 0.79                       | 0.292                          | 2.139  | 0.2977         |
| Masters                                              | 0.834                      | 0.303                          | 2.298  | 0.4127         |
| <b>Credit card statement data (n=324)</b>            | <b>Adjusted Odds Ratio</b> | <b>95% confidence interval</b> |        | <b>P-Value</b> |
| Account accessed without permission                  | 1.931                      | 1.033                          | 3.608  | 0.0393**       |
| Age range (ref = over 60)                            |                            |                                |        |                |
| Indent 18 to 30                                      | 0.585                      | 0.249                          | 1.373  | 0.6735         |
| Indent 31 to 40                                      | 0.676                      | 0.303                          | 1.511  | 0.9709         |
| Indent 41 to 50                                      | 0.76                       | 0.314                          | 1.842  | 0.7036         |
| Indent 51 to 60                                      | 0.446                      | 0.186                          | 1.072  | 0.2185         |

|                                                      |                                   |                                       |        |                       |
|------------------------------------------------------|-----------------------------------|---------------------------------------|--------|-----------------------|
| Education                                            |                                   |                                       |        |                       |
| High school                                          | 4.346                             | 0.717                                 | 26.353 | 0.0524**              |
| Some College/Associates/Trade School                 | 1.019                             | 0.351                                 | 2.958  | 0.5204                |
| Bachelors                                            | 0.997                             | 0.353                                 | 2.814  | 0.4452                |
| Masters                                              | 0.648                             | 0.221                                 | 1.903  | 0.035**               |
| <b>Location Data</b>                                 |                                   |                                       |        |                       |
| <b><i>Ridesharing history data (n= 189)</i></b>      | <b><i>Adjusted Odds Ratio</i></b> | <b><i>95% confidence interval</i></b> |        | <b><i>P-Value</i></b> |
| Account accessed without permission                  | 1.081                             | 0.578                                 | 2.021  | 0.8082                |
| Age range (ref = over 60)                            |                                   |                                       |        |                       |
| 18 to 30                                             | 3.243                             | 1.324                                 | 7.944  | 0.1417                |
| 31 to 40                                             | 2.073                             | 0.825                                 | 5.207  | 0.9195                |
| 41 to 50                                             | 2.113                             | 0.776                                 | 5.759  | 0.9754                |
| 51 to 60                                             | 3.129                             | 1.131                                 | 8.655  | 0.2689                |
| Education (ref = Doctorate or other terminal degree) |                                   |                                       |        |                       |
| High school                                          | 3.009                             | 0.367                                 | 24.688 | 0.3955                |
| Some College/Associates/Trade School                 | 1.593                             | 0.496                                 | 5.112  | 0.9462                |
| Bachelors                                            | 1.563                             | 0.528                                 | 4.621  | 0.9879                |
| Masters                                              | 1.215                             | 0.394                                 | 3.745  | 0.4479                |
| <b><i>Geolocation data (n= 325)</i></b>              | <b><i>Adjusted Odds Ratio</i></b> | <b><i>95% confidence interval</i></b> |        | <b><i>P-Value</i></b> |
| Account accessed without permission                  | 1.771                             | 1.086                                 | 2.886  | 0.0219**              |
| Age range (ref = over 60)                            |                                   |                                       |        |                       |
| 18 to 30                                             | 1.205                             | 0.603                                 | 2.41   | 0.5783                |
| 31 to 40                                             | 1.134                             | 0.58                                  | 2.221  | 0.7468                |
| 41 to 50                                             | 0.671                             | 0.309                                 | 1.457  | 0.11                  |
| 51 to 60                                             | 1.4                               | 0.706                                 | 2.775  | 0.2376                |
| Education (ref = Doctorate or other terminal degree) |                                   |                                       |        |                       |
| High school                                          | 3.405                             | 0.536                                 | 21.644 | 0.1039*               |
| Some College/Associates/Trade School                 | 1.146                             | 0.476                                 | 2.76   | 0.8617                |
| Bachelors                                            | 0.835                             | 0.354                                 | 1.966  | 0.2902                |
| Masters                                              | 0.48                              | 0.197                                 | 1.17   | 0.0027**              |
| <b><i>Voting History Data (n= 327)</i></b>           | <b><i>Adjusted Odds Ratio</i></b> | <b><i>95% confidence interval</i></b> |        | <b><i>P-Value</i></b> |
| Account accessed without permission                  | 1.434                             | 0.9                                   | 2.286  | 0.1292                |

|                                                      |       |       |       |          |
|------------------------------------------------------|-------|-------|-------|----------|
| Age range (ref = over 60)                            |       |       |       |          |
| 18 to 30                                             | 2.756 | c     | 5.53  | 0.0152** |
| 31 to 40                                             | 1.457 | 0.765 | 2.773 | 0.9208   |
| 41 to 50                                             | 1.474 | 0.705 | 3.08  | 0.9669   |
| 51 to 60                                             | 1.243 | 0.644 | 2.399 | 0.442    |
| Education (ref = Doctorate or other terminal degree) |       |       |       |          |
| High school                                          | 1.095 | 0.198 | 6.047 | 0.8178   |
| Some College/Associates/Trade School                 | 1.616 | 0.655 | 3.985 | 0.3484   |
| Bachelors                                            | 1.674 | 0.697 | 4.017 | 0.251    |
| Masters                                              | 1.1   | 0.453 | 2.671 | 0.5757   |

\*\*Significant value ( $p \leq 0.05$ )

\*Modestly significant value ( $p \leq 0.10$ )
