# Supplementary material for: A Survey of Research Participants’ Privacy-Related Experiences and Willingness to Share Real-World Data with Researchers
Source: MDPI journal article supplement (doi:10.3390/jpm12111922), 2022-11-17
Supplement: s1 [file s1]

**Table S1.** Summary of survey respondents' demographics (excluding non-responses).

|                                                                | <b>N (%) respondents</b> |
|----------------------------------------------------------------|--------------------------|
| <b>Age Range (years)</b>                                       |                          |
| 18 to 30                                                       | 66 (17%)                 |
| 31 to 40                                                       | 78 (19%)                 |
| 41 to 50                                                       | 57 (14%)                 |
| 51 to 60                                                       | 71 (18%)                 |
| Over 60                                                        | 126 (31%)                |
| <b>Education Level</b>                                         |                          |
| High School                                                    | 12 (3%)                  |
| Some College/Associates/Trade School                           | 98 (24%)                 |
| Bachelors                                                      | 138 (34%)                |
| Masters                                                        | 117 (29%)                |
| Doctorate or other terminal degree                             | 35 (9%)                  |
| <b>Duration of using online medical websites (years)</b>       |                          |
| Less than 1                                                    | 18 (4%)                  |
| 2 to 3                                                         | 36 (9%)                  |
| 4 to 5                                                         | 53 (13%)                 |
| 6 to 7                                                         | 38 (9%)                  |
| More than 7                                                    | 224 (56%)                |
| Never                                                          | 5 (1%)                   |
| Unsure                                                         | 26 (6%)                  |
| <b>Annual frequency of getting ill (number of occurrences)</b> |                          |
| Less than 1                                                    | 193 (48%)                |
| 2 to 3                                                         | 149 (37%)                |
| 4 to 6                                                         | 35 (9%)                  |
| 7 to 10                                                        | 5 (1%)                   |
| More than 10                                                   | 16 (4%)                  |
