# Supplementary material for: A Survey of Research Participants’ Privacy-Related Experiences and Willingness to Share Real-World Data with Researchers
Source: MDPI journal article supplement (doi:10.3390/jpm12111922), 2022-11-17
Supplement: s1 [file s1]

**Table S10.** Associations between willingness to share real-world data from various sources and experienced privacy of personal information being violated, adjusted for age range and education level.

| Real-World Data Source                               | Logistic regression results |                         |        |         |
|------------------------------------------------------|-----------------------------|-------------------------|--------|---------|
| Social Media Data                                    |                             |                         |        |         |
| Facebook data (n= 243)                               | Adjusted Odds Ratio         | 95% confidence interval |        | P-Value |
| Privacy of personal information being violated       | 0.875                       | 0.509                   | 1.506  | 0.6303  |
| Age range (ref = over 60)                            |                             |                         |        |         |
| 18 to 30                                             | 1.152                       | 0.494                   | 2.686  | 0.6037  |
| 31 to 40                                             | 0.81                        | 0.376                   | 1.746  | 0.4499  |
| 41 to 50                                             | 0.633                       | 0.274                   | 1.462  | 0.1317  |
| 51 to 60                                             | 1.584                       | 0.711                   | 3.529  | 0.0902* |
| Education (ref = Doctorate or other terminal degree) |                             |                         |        |         |
| High school                                          | 5.985                       | 0.603                   | 59.415 | 0.1204  |
| Some College/Associates/Trade School                 | 1.233                       | 0.434                   | 3.502  | 0.4846  |
| Bachelors                                            | 1.301                       | 0.469                   | 3.612  | 0.5795  |
| Masters                                              | 0.922                       | 0.332                   | 2.563  | 0.0987* |
| Twitter data (n= 122)                                | Adjusted Odds Ratio         | 95% confidence interval |        | P-Value |
| Privacy of personal information being violated       | 1.132                       | 0.487                   | 2.631  | 0.2523  |
| Age range (ref = over 60)                            |                             |                         |        |         |
| 18 to 30                                             | 4.476                       | 1.243                   | 16.114 | 0.7739  |
| 31 to 40                                             | 2.975                       | 0.936                   | 9.455  | 0.1588  |
| 41 to 50                                             | 1.405                       | 0.396                   | 4.982  | 0.5904  |
| 51 to 60                                             | 4.575                       | 1.256                   | 16.663 | 0.1928  |
| Education (ref = Doctorate or other terminal degree) |                             |                         |        |         |
| High school                                          | 0.949                       | 0.064                   | 14.058 | 0.1527  |
| Some College/Associates/Trade School                 | 0.28                        | 0.057                   | 1.372  | 0.6638  |
| Bachelors                                            | 0.732                       | 0.159                   | 3.371  | 0.0723* |
| Masters                                              | 0.478                       | 0.1                     | 2.287  | 0.6851  |
| Instagram data (n= 173)                              | Adjusted Odds Ratio         | 95% confidence interval |        | P-Value |
| Privacy of personal information being violated       | 0.825                       | 0.426                   | 1.597  | 0.5677  |
| Age range (ref = over 60)                            |                             |                         |        |         |
| 18 to 30                                             | 1.755                       | 0.651                   | 4.73   | 0.7635  |

|                                                      |                                   |                                       |                       |         |
|------------------------------------------------------|-----------------------------------|---------------------------------------|-----------------------|---------|
| 31 to 40                                             | 1.515                             | 0.577                                 | 3.98                  | 0.855   |
| 41 to 50                                             | 1.969                             | 0.688                                 | 5.64                  | 0.5377  |
| 51 to 60                                             | 1.993                             | 0.656                                 | 6.055                 | 0.5549  |
| Education (ref = Doctorate or other terminal degree) |                                   |                                       |                       |         |
| High school                                          | 2.863                             | 0.233                                 | 35.101                | 0.5454  |
| Some College/Associates/Trade School                 | 1.403                             | 0.402                                 | 4.897                 | 0.7077  |
| Bachelors                                            | 2.048                             | 0.608                                 | 6.904                 | 0.509   |
| Masters                                              | 1.345                             | 0.404                                 | 4.48                  | 0.5999  |
| <b><i>Snapchat data (n= 103)</i></b>                 | <b><i>Adjusted Odds Ratio</i></b> | <b><i>95% confidence interval</i></b> | <b><i>P-Value</i></b> |         |
| Privacy of personal information being violated       | 1.186                             | 0.48                                  | 2.93                  | 0.7122  |
| Age range (ref = over 60)                            |                                   |                                       |                       |         |
| 18 to 30                                             | -                                 | -                                     | -                     | -       |
| 31 to 40                                             | -                                 | -                                     | -                     | -       |
| 41 to 50                                             | -                                 | -                                     | -                     | -       |
| 51 to 60                                             | -                                 | -                                     | -                     | -       |
| Education (ref = Doctorate or other terminal degree) |                                   |                                       |                       |         |
| High school                                          | 1.158                             | 0.048                                 | 28.047                | 0.754   |
| Some College/Associates/Trade School                 | 0.301                             | 0.053                                 | 1.729                 | 0.0764* |
| Bachelors                                            | 0.959                             | 0.199                                 | 4.636                 | 0.6866  |
| Masters                                              | 0.977                             | 0.186                                 | 5.127                 | 0.6869  |
| <b><i>Yelp reviews and ratings data (n= 168)</i></b> | <b><i>Adjusted Odds Ratio</i></b> | <b><i>95% confidence interval</i></b> | <b><i>P-Value</i></b> |         |
| Privacy of personal information being violated       | 0.748                             | 0.366                                 | 1.527                 | 0.4251  |
| Age range (ref = over 60)                            |                                   |                                       |                       |         |
| 18 to 30                                             | 2.484                             | 0.828                                 | 7.454                 | 0.6084  |
| 31 to 40                                             | 1.747                             | 0.703                                 | 4.342                 | 0.6593  |
| 41 to 50                                             | 2.062                             | 0.792                                 | 5.37                  | 0.9497  |
| 51 to 60                                             | 3.732                             | 1.324                                 | 10.523                | 0.1109  |
| Education (ref = Doctorate or other terminal degree) |                                   |                                       |                       |         |
| High school                                          | -                                 | -                                     | -                     | -       |
| Some College/Associates/Trade School                 | 0.996                             | 0.29                                  | 3.417                 | 0.977   |
| Bachelors                                            | 1.107                             | 0.326                                 | 3.758                 | 0.9779  |
| Masters                                              | 1.191                             | 0.347                                 | 4.087                 | 0.9786  |
| <b>Health Data</b>                                   |                                   |                                       |                       |         |

| <b><i>Fitness tracker data (n= 212)</i></b>           | <b><i>Adjusted Odds Ratio</i></b> | <b><i>95% confidence interval</i></b> |       | <b><i>P-Value</i></b> |
|-------------------------------------------------------|-----------------------------------|---------------------------------------|-------|-----------------------|
| Privacy of personal information being violated        | 0.84                              | 0.43                                  | 1.644 | 0.6114                |
| Age range (ref = over 60)                             |                                   |                                       |       |                       |
| 18 to 30                                              | 3.044                             | 1.046                                 | 8.853 | 0.2099                |
| 31 to 40                                              | 1.364                             | 0.596                                 | 3.122 | 0.3211                |
| 41 to 50                                              | 1.579                             | 0.645                                 | 3.863 | 0.6497                |
| 51 to 60                                              | 3.176                             | 1.117                                 | 9.027 | 0.1655                |
| Education (ref = Doctorate or other terminal degree)  |                                   |                                       |       |                       |
| High school                                           | 0.613                             | 0.081                                 | 4.646 | 0.5574                |
| Some College/Associates/Trade School                  | 0.999                             | 0.341                                 | 2.924 | 0.91                  |
| Bachelors                                             | 1.252                             | 0.431                                 | 3.635 | 0.4331                |
| Masters                                               | 1.068                             | 0.383                                 | 2.978 | 0.7378                |
| <b><i>Prescription history data (n= 317)</i></b>      | <b><i>Adjusted Odds Ratio</i></b> | <b><i>95% confidence interval</i></b> |       | <b><i>P-Value</i></b> |
| Privacy of personal information being violated        | 0.797                             | 0.499                                 | 1.273 | 0.3416                |
| Age range (ref = over 60)                             |                                   |                                       |       |                       |
| 18 to 30                                              | 1.502                             | 0.732                                 | 3.084 | 0.0447**              |
| 31 to 40                                              | 0.832                             | 0.436                                 | 1.585 | 0.7919                |
| 41 to 50                                              | 0.486                             | 0.233                                 | 1.014 | 0.0274**              |
| 51 to 60                                              | 0.891                             | 0.465                                 | 1.707 | 0.9754                |
| Education (ref = Doctorate or other terminal degree)  |                                   |                                       |       |                       |
| High school                                           | 1.258                             | 0.283                                 | 5.589 | 0.9486                |
| Some College/Associates/Trade School                  | 1.459                             | 0.593                                 | 3.588 | 0.4613                |
| Bachelors                                             | 1.486                             | 0.621                                 | 3.556 | 0.3838                |
| Masters                                               | 0.973                             | 0.402                                 | 2.358 | 0.3522                |
| <b><i>Electronic medical record data (n= 317)</i></b> | <b><i>Adjusted Odds Ratio</i></b> | <b><i>95% confidence interval</i></b> |       | <b><i>P-Value</i></b> |
| Privacy of personal information being violated        | 0.856                             | 0.536                                 | 1.368 | 0.5158                |
| Age range (ref = over 60)                             |                                   |                                       |       |                       |
| 18 to 30                                              | 0.441                             | 0.217                                 | 0.897 | 0.2467                |
| 31 to 40                                              | 0.656                             | 0.341                                 | 1.26  | 0.6792                |
| 41 to 50                                              | 0.464                             | 0.225                                 | 0.96  | 0.3503                |
| 51 to 60                                              | 0.556                             | 0.288                                 | 1.076 | 0.7746                |
| Education (ref = Doctorate or other terminal degree)  |                                   |                                       |       |                       |
| High school                                           | 0.744                             | 0.143                                 | 3.857 | 0.7923                |

|                                                      |                            |                                |       |                |
|------------------------------------------------------|----------------------------|--------------------------------|-------|----------------|
| Some College/Associates/Trade School                 | 0.78                       | 0.317                          | 1.917 | 0.6653         |
| Bachelors                                            | 1.1                        | 0.461                          | 2.621 | 0.3326         |
| Masters                                              | 0.791                      | 0.327                          | 1.91  | 0.6949         |
| <b>Genetic data (n= 227)</b>                         | <b>Adjusted Odds Ratio</b> | <b>95% confidence interval</b> |       | <b>P-Value</b> |
| Privacy of personal information being violated       | 0.856                      | 0.493                          | 1.487 | 0.5809         |
| Age range (ref = over 60)                            |                            |                                |       |                |
| 18 to 30                                             | 0.622                      | 0.267                          | 1.446 | 0.6749         |
| 31 to 40                                             | 0.601                      | 0.269                          | 1.344 | 0.5731         |
| 41 to 50                                             | 0.51                       | 0.23                           | 1.132 | 0.2572         |
| 51 to 60                                             | 0.935                      | 0.427                          | 2.048 | 0.3259         |
| Education (ref = Doctorate or other terminal degree) |                            |                                |       |                |
| High school                                          | 0.407                      | 0.063                          | 2.616 | 0.3384         |
| Some College/Associates/Trade School                 | 0.985                      | 0.364                          | 2.663 | 0.4629         |
| Bachelors                                            | 0.918                      | 0.353                          | 2.384 | 0.5953         |
| Masters                                              | 0.841                      | 0.315                          | 2.242 | 0.8345         |
| <b>Direct Communication Data</b>                     |                            |                                |       |                |
| <b>Text message and phone data (n= 317)</b>          | <b>Adjusted Odds Ratio</b> | <b>95% confidence interval</b> |       | <b>P-Value</b> |
| Privacy of personal information being violated       | 0.945                      | 0.572                          | 1.56  | 0.8244         |
| Age range (ref = over 60)                            |                            |                                |       |                |
| 18 to 30                                             | 0.913                      | 0.423                          | 1.974 | 0.663          |
| 31 to 40                                             | 1.429                      | 0.722                          | 2.829 | 0.1732         |
| 41 to 50                                             | 0.873                      | 0.392                          | 1.948 | 0.5698         |
| 51 to 60                                             | 1.024                      | 0.504                          | 2.08  | 0.9777         |
| Education (ref = Doctorate or other terminal degree) |                            |                                |       |                |
| High school                                          | 1.253                      | 0.246                          | 6.385 | 0.8363         |
| Some College/Associates/Trade School                 | 1.211                      | 0.461                          | 3.183 | 0.7439         |
| Bachelors                                            | 1.272                      | 0.498                          | 3.25  | 0.5819         |
| Masters                                              | 0.876                      | 0.334                          | 2.294 | 0.3688         |
| <b>Email history data (n= 319)</b>                   | <b>Adjusted Odds Ratio</b> | <b>95% confidence interval</b> |       | <b>P-Value</b> |
| Privacy of personal information being violated       | 0.832                      | 0.505                          | 1.37  | 0.4698         |
| Age range (ref = over 60)                            |                            |                                |       |                |
| 18 to 30                                             | 0.747                      | 0.348                          | 1.604 | 0.3551         |
| 31 to 40                                             | 1.093                      | 0.546                          | 2.188 | 0.6199         |

|                                                      |                            |                                |        |                |
|------------------------------------------------------|----------------------------|--------------------------------|--------|----------------|
| 41 to 50                                             | 0.82                       | 0.373                          | 1.803  | 0.5688         |
| 51 to 60                                             | 1.263                      | 0.638                          | 2.5    | 0.2728         |
| Education (ref = Doctorate or other terminal degree) |                            |                                |        |                |
| High school                                          | 2.173                      | 0.465                          | 10.155 | 0.5374         |
| Some College/Associates/Trade School                 | 2.318                      | 0.877                          | 6.126  | 0.115          |
| Bachelors                                            | 1.85                       | 0.713                          | 4.801  | 0.4731         |
| Masters                                              | 0.987                      | 0.365                          | 2.668  | 0.0858*        |
| <b>Online Browsing or Streaming Data</b>             |                            |                                |        |                |
| <b>Music streaming data (n= 245)</b>                 | <b>Adjusted Odds Ratio</b> | <b>95% confidence interval</b> |        | <b>P-Value</b> |
| Privacy of personal information being violated       | 0.868                      | 0.485                          | 1.553  | 0.633          |
| Age range (ref = over 60)                            |                            |                                |        |                |
| 18 to 30                                             | 9.809                      | 3.639                          | 26.441 | 0.0017**       |
| 31 to 40                                             | 2.977                      | 1.349                          | 6.57   | 0.6942         |
| 41 to 50                                             | 2.567                      | 1.098                          | 6.001  | 0.3916         |
| 51 to 60                                             | 5.223                      | 2.099                          | 12.993 | 0.144          |
| Education (ref = Doctorate or other terminal degree) |                            |                                |        |                |
| High school                                          | 0.883                      | 0.123                          | 6.322  | 0.8104         |
| Some College/Associates/Trade School                 | 1.544                      | 0.539                          | 4.425  | 0.2448         |
| Bachelors                                            | 0.789                      | 0.293                          | 2.124  | 0.3255         |
| Masters                                              | 1.209                      | 0.438                          | 3.336  | 0.6544         |
| <b>Google search history data (n= 323)</b>           | <b>Adjusted Odds Ratio</b> | <b>95% confidence interval</b> |        | <b>P-Value</b> |
| Privacy of personal information being violated       | 0.977                      | 0.614                          | 1.555  | 0.9227         |
| Age range (ref = over 60)                            |                            |                                |        |                |
| 18 to 30                                             | 0.968                      | 0.478                          | 1.962  | 0.6484         |
| 31 to 40                                             | 1.032                      | 0.538                          | 1.977  | 0.8174         |
| 41 to 50                                             | 0.892                      | 0.434                          | 1.834  | 0.4489         |
| 51 to 60                                             | 1.712                      | 0.89                           | 3.294  | 0.0514**       |
| Education (ref = Doctorate or other terminal degree) |                            |                                |        |                |
| High school                                          | 3.364                      | 0.708                          | 15.985 | 0.1024         |
| Some College/Associates/Trade School                 | 1.383                      | 0.578                          | 3.313  | 0.8642         |
| Bachelors                                            | 0.924                      | 0.396                          | 2.156  | 0.124          |
| Masters                                              | 0.951                      | 0.402                          | 2.247  | 0.172          |

| <b>Financial Data</b>                                |                            |                                |        |                |
|------------------------------------------------------|----------------------------|--------------------------------|--------|----------------|
| <b>Online purchase history data (n= 319)</b>         | <b>Adjusted Odds Ratio</b> | <b>95% confidence interval</b> |        | <b>P-Value</b> |
| Privacy of personal information being violated       | 0.803                      | 0.505                          | 1.277  | 0.3536         |
| Age range (ref = over 60)                            |                            |                                |        |                |
| 18 to 30                                             | 1.445                      | 0.717                          | 2.912  | 0.8426         |
| 31 to 40                                             | 1.648                      | 0.86                           | 3.16   | 0.4271         |
| 41 to 50                                             | 1.051                      | 0.508                          | 2.172  | 0.3065         |
| 51 to 60                                             | 1.961                      | 1.01                           | 3.81   | 0.1298         |
| Education (ref = Doctorate or other terminal degree) |                            |                                |        |                |
| High school                                          | 3.833                      | 0.663                          | 22.174 | 0.1022*        |
| Some College/Associates/Trade School                 | 1.085                      | 0.451                          | 2.611  | 0.475          |
| Bachelors                                            | 1.019                      | 0.436                          | 2.382  | 0.3079         |
| Masters                                              | 0.911                      | 0.383                          | 2.166  | 0.1585         |
| <b>Tax records and income history data (n= 314)</b>  | <b>Adjusted Odds Ratio</b> | <b>95% confidence interval</b> |        | <b>P-Value</b> |
| Privacy of personal information being violated       | 1.23                       | 0.678                          | 2.23   | 0.4955         |
| Age range (ref = over 60)                            |                            |                                |        |                |
| 18 to 30                                             | 1.175                      | 0.487                          | 2.83   | 0.6917         |
| 31 to 40                                             | 1.76                       | 0.82                           | 3.78   | 0.045**        |
| 41 to 50                                             | 0.707                      | 0.256                          | 1.951  | 0.3131         |
| 51 to 60                                             | 0.815                      | 0.34                           | 1.953  | 0.4451         |
| Education (ref = Doctorate or other terminal degree) |                            |                                |        |                |
| High school                                          | 3.079                      | 0.481                          | 19.708 | 0.1179         |
| Some College/Associates/Trade School                 | 0.812                      | 0.288                          | 2.293  | 0.3943         |
| Bachelors                                            | 0.692                      | 0.252                          | 1.9    | 0.1413         |
| Masters                                              | 0.762                      | 0.274                          | 2.117  | 0.2785         |
| <b>Credit card statement data (n=306)</b>            | <b>Adjusted Odds Ratio</b> | <b>95% confidence interval</b> |        | <b>P-Value</b> |
| Privacy of personal information being violated       | 0.942                      | 0.515                          | 1.722  | 0.8457         |
| Age range (ref = over 60)                            |                            |                                |        |                |
| Indent 18 to 30                                      | 0.637                      | 0.259                          | 1.569  | 0.673          |
| Indent 31 to 40                                      | 0.877                      | 0.387                          | 1.991  | 0.5578         |
| Indent 41 to 50                                      | 0.68                       | 0.261                          | 1.77   | 0.8307         |
| Indent 51 to 60                                      | 0.563                      | 0.234                          | 1.353  | 0.4162         |
| Education                                            |                            |                                |        |                |

|                                                      |                            |                                |        |                |
|------------------------------------------------------|----------------------------|--------------------------------|--------|----------------|
| High school                                          | 5.163                      | 0.929                          | 28.682 | 0.0316**       |
| Some College/Associates/Trade School                 | 1.189                      | 0.378                          | 3.739  | 0.5364         |
| Bachelors                                            | 1.25                       | 0.414                          | 3.777  | 0.6169         |
| Masters                                              | 0.801                      | 0.255                          | 2.517  | 0.0592*        |
| <b>Location Data</b>                                 |                            |                                |        |                |
| <b>Ridesharing history data (n= 178)</b>             | <b>Adjusted Odds Ratio</b> | <b>95% confidence interval</b> |        | <b>P-Value</b> |
| Privacy of personal information being violated       | 0.874                      | 0.462                          | 1.651  | 0.678          |
| Age range (ref = over 60)                            |                            |                                |        |                |
| 18 to 30                                             | 4.363                      | 1.654                          | 11.51  | 0.0484**       |
| 31 to 40                                             | 2.246                      | 0.884                          | 5.706  | 0.8726         |
| 41 to 50                                             | 2.419                      | 0.859                          | 6.814  | 0.9397         |
| 51 to 60                                             | 3.061                      | 1.103                          | 8.496  | 0.4427         |
| Education (ref = Doctorate or other terminal degree) |                            |                                |        |                |
| High school                                          | 2.158                      | 0.268                          | 17.355 | 0.535          |
| Some College/Associates/Trade School                 | 1.631                      | 0.517                          | 5.142  | 0.5734         |
| Bachelors                                            | 1.091                      | 0.375                          | 3.174  | 0.5378         |
| Masters                                              | 1.081                      | 0.361                          | 3.239  | 0.5324         |
| <b>Geolocation data (n= 312)</b>                     | <b>Adjusted Odds Ratio</b> | <b>95% confidence interval</b> |        | <b>P-Value</b> |
| Privacy of personal information being violated       | 0.899                      | 0.557                          | 1.452  | 0.6646         |
| Age range (ref = over 60)                            |                            |                                |        |                |
| 18 to 30                                             | 0.88                       | 0.426                          | 1.815  | 0.7817         |
| 31 to 40                                             | 1.024                      | 0.525                          | 1.998  | 0.7341         |
| 41 to 50                                             | 0.657                      | 0.307                          | 1.407  | 0.1877         |
| 51 to 60                                             | 1.275                      | 0.646                          | 2.518  | 0.2133         |
| Education (ref = Doctorate or other terminal degree) |                            |                                |        |                |
| High school                                          | 1.253                      | 0.252                          | 6.214  | 0.5478         |
| Some College/Associates/Trade School                 | 1.096                      | 0.455                          | 2.636  | 0.3871         |
| Bachelors                                            | 0.766                      | 0.326                          | 1.801  | 0.5644         |
| Masters                                              | 0.5                        | 0.207                          | 1.209  | 0.0285**       |
| <b>Voting History Data (n= 309)</b>                  | <b>Adjusted Odds Ratio</b> | <b>95% confidence interval</b> |        | <b>P-Value</b> |
| Privacy of personal information being violated       | 1.075                      | 0.669                          | 1.727  | 0.7661         |
| Age range (ref = over 60)                            |                            |                                |        |                |
| 18 to 30                                             | 3.209                      | 1.543                          | 6.673  | 0.0046**       |

|                                                      |       |       |       |        |
|------------------------------------------------------|-------|-------|-------|--------|
| 31 to 40                                             | 1.447 | 0.751 | 2.788 | 0.8645 |
| 41 to 50                                             | 1.419 | 0.674 | 2.99  | 0.8293 |
| 51 to 60                                             | 1.173 | 0.601 | 2.289 | 0.2965 |
| Education (ref = Doctorate or other terminal degree) |       |       |       |        |
| High school                                          | 1.403 | 0.276 | 7.133 | 0.9974 |
| Some College/Associates/Trade School                 | 1.854 | 0.738 | 4.659 | 0.2775 |
| Bachelors                                            | 1.478 | 0.603 | 3.622 | 0.8243 |
| Masters                                              | 1.4   | 0.569 | 3.445 | 0.9996 |

\*\*Significant value ( $p \leq 0.05$ )

\*Modestly significant value ( $p \leq 0.10$ )
