# Supplementary material for: A Survey of Research Participants’ Privacy-Related Experiences and Willingness to Share Real-World Data with Researchers
Source: MDPI journal article supplement (doi:10.3390/jpm12111922), 2022-11-17
Supplement: s1 [file s1]

**Table S7.** Associations between willingness to share real-world data from various sources and experienced being victim of fraud and/or identity theft, adjusted for age range and education level.

| Real-World Data Source                               | Logistic regression results |                         |        |          |
|------------------------------------------------------|-----------------------------|-------------------------|--------|----------|
| Social Media Data                                    |                             |                         |        |          |
| Facebook data (n= 270)                               | Adjusted Odds Ratio         | 95% confidence interval |        | P-Value  |
| Victim of fraud and/or identity theft                | 0.729                       | 0.43                    | 1.235  | 0.2395   |
| Age range (ref = over 60)                            |                             |                         |        |          |
| 18 to 30                                             | 1.274                       | 0.569                   | 2.852  | 0.5827   |
| 31 to 40                                             | 1.004                       | 0.473                   | 2.132  | 0.7419   |
| 41 to 50                                             | 0.756                       | 0.345                   | 1.657  | 0.1865   |
| 51 to 60                                             | 1.61                        | 0.734                   | 3.531  | 0.1586   |
| Education (ref = Doctorate or other terminal degree) |                             |                         |        |          |
| High school                                          | 2.033                       | 0.323                   | 12.817 | 0.3577   |
| Some College/Associates/Trade School                 | 1.112                       | 0.394                   | 3.137  | 0.9749   |
| Bachelors                                            | 0.931                       | 0.341                   | 2.539  | 0.5289   |
| Masters                                              | 0.772                       | 0.281                   | 2.125  | 0.1929   |
| Twitter data (n= 131)                                | Adjusted Odds Ratio         | 95% confidence interval |        | P-Value  |
| Victim of fraud and/or identity theft                | 0.794                       | 0.34                    | 1.854  | 0.5937   |
| Age range (ref = over 60)                            |                             |                         |        |          |
| 18 to 30                                             | 3.241                       | 0.887                   | 11.852 | 0.3347   |
| 31 to 40                                             | 2.248                       | 0.689                   | 7.337  | 0.8963   |
| 41 to 50                                             | 1.393                       | 0.421                   | 4.611  | 0.2915   |
| 51 to 60                                             | 4.4                         | 1.173                   | 16.507 | 0.1172   |
| Education (ref = Doctorate or other terminal degree) |                             |                         |        |          |
| High school                                          | 0.839                       | 0.054                   | 13.069 | 0.5611   |
| Some College/Associates/Trade School                 | 0.191                       | 0.033                   | 1.099  | 0.0327** |
| Bachelors                                            | 0.555                       | 0.101                   | 3.05   | 0.7391   |
| Masters                                              | 0.3                         | 0.054                   | 1.677  | 0.2517   |
| Instagram data (n= 196)                              | Adjusted Odds Ratio         | 95% confidence interval |        | P-Value  |
| Victim of fraud and/or identity theft                | 0.633                       | 0.337                   | 1.187  | 0.1539   |
| Age range (ref = over 60)                            |                             |                         |        |          |
| 18 to 30                                             | 1.388                       | 0.523                   | 3.685  | 0.8878   |

|                                                      |                            |                                |                |        |
|------------------------------------------------------|----------------------------|--------------------------------|----------------|--------|
| 31 to 40                                             | 1.358                      | 0.53                           | 3.48           | 0.8207 |
| 41 to 50                                             | 1.871                      | 0.675                          | 5.186          | 0.4353 |
| 51 to 60                                             | 1.804                      | 0.61                           | 5.333          | 0.5456 |
| Education (ref = Doctorate or other terminal degree) |                            |                                |                |        |
| High school                                          | 2.133                      | 0.186                          | 24.407         | 0.5189 |
| Some College/Associates/Trade School                 | 1.057                      | 0.309                          | 3.613          | 0.7597 |
| Bachelors                                            | 1.345                      | 0.415                          | 4.365          | 0.7059 |
| Masters                                              | 0.764                      | 0.237                          | 2.468          | 0.1954 |
| <b>Snapshot data (n= 110)</b>                        | <b>Adjusted Odds Ratio</b> | <b>95% confidence interval</b> | <b>P-Value</b> |        |
| Victim of fraud and/or identity theft                | 1.383                      | 0.57                           | 3.354          | 0.4735 |
| Age range (ref = over 60)                            |                            |                                |                |        |
| 18 to 30                                             | -                          | -                              | -              | -      |
| 31 to 40                                             | -                          | -                              | -              | -      |
| 41 to 50                                             | -                          | -                              | -              | -      |
| 51 to 60                                             | -                          | -                              | -              | -      |
| Education (ref = Doctorate or other terminal degree) |                            |                                |                |        |
| High school                                          | 0.665                      | 0.028                          | 15.755         | 0.8498 |
| Some College/Associates/Trade School                 | 0.2                        | 0.034                          | 1.186          | 0.065* |
| Bachelors                                            | 0.506                      | 0.101                          | 2.551          | 0.908  |
| Masters                                              | 0.636                      | 0.117                          | 3.471          | 0.7228 |
| <b>Yelp reviews and ratings data (n= 185)</b>        | <b>Adjusted Odds Ratio</b> | <b>95% confidence interval</b> | <b>P-Value</b> |        |
| Victim of fraud and/or identity theft                | 0.793                      | 0.416                          | 1.513          | 0.4823 |
| Age range (ref = over 60)                            |                            |                                |                |        |
| 18 to 30                                             | 1.989                      | 0.705                          | 5.609          | 0.9448 |
| 31 to 40                                             | 2.056                      | 0.812                          | 5.205          | 0.859  |
| 41 to 50                                             | 2.158                      | 0.874                          | 5.328          | 0.7469 |
| 51 to 60                                             | 3.1                        | 1.162                          | 8.268          | 0.1961 |
| Education (ref = Doctorate or other terminal degree) |                            |                                |                |        |
| High school                                          | -                          | -                              | -              | -      |
| Some College/Associates/Trade School                 | 1.07                       | 0.322                          | 3.551          | 0.9781 |
| Bachelors                                            | 1.075                      | 0.327                          | 3.531          | 0.9782 |
| Masters                                              | 0.999                      | 0.309                          | 3.228          | 0.9775 |

| <b>Health Data</b>                                    |                                   |                                       |       |                       |
|-------------------------------------------------------|-----------------------------------|---------------------------------------|-------|-----------------------|
| <b><i>Fitness tracker data (n= 226)</i></b>           | <b><i>Adjusted Odds Ratio</i></b> | <b><i>95% confidence interval</i></b> |       | <b><i>P-Value</i></b> |
| Victim of fraud and/or identity theft                 | 1.032                             | 0.547                                 | 1.948 | 0.9221                |
| Age range (ref = over 60)                             |                                   |                                       |       |                       |
| 18 to 30                                              | 3.27                              | 1.121                                 | 9.539 | 0.1842                |
| 31 to 40                                              | 1.537                             | 0.66                                  | 3.575 | 0.4706                |
| 41 to 50                                              | 1.713                             | 0.696                                 | 4.217 | 0.7384                |
| 51 to 60                                              | 3.022                             | 1.075                                 | 8.494 | 0.2486                |
| Education (ref = Doctorate or other terminal degree)  |                                   |                                       |       |                       |
| High school                                           | 0.671                             | 0.094                                 | 4.81  | 0.687                 |
| Some College/Associates/Trade School                  | 0.871                             | 0.291                                 | 2.606 | 0.9195                |
| Bachelors                                             | 1.189                             | 0.397                                 | 3.567 | 0.4163                |
| Masters                                               | 0.856                             | 0.305                                 | 2.398 | 0.8641                |
| <b><i>Prescription history data (n= 355)</i></b>      | <b><i>Adjusted Odds Ratio</i></b> | <b><i>95% confidence interval</i></b> |       | <b><i>P-Value</i></b> |
| Victim of fraud and/or identity theft                 | 1.266                             | 0.812                                 | 1.975 | 0.2984                |
| Age range (ref = over 60)                             |                                   |                                       |       |                       |
| 18 to 30                                              | 1.323                             | 0.674                                 | 2.594 | 0.0771*               |
| 31 to 40                                              | 0.922                             | 0.495                                 | 1.717 | 0.7538                |
| 41 to 50                                              | 0.518                             | 0.26                                  | 1.034 | 0.0473**              |
| 51 to 60                                              | 0.742                             | 0.397                                 | 1.39  | 0.5149                |
| Education (ref = Doctorate or other terminal degree)  |                                   |                                       |       |                       |
| High school                                           | 1.298                             | 0.327                                 | 5.147 | 0.8308                |
| Some College/Associates/Trade School                  | 1.483                             | 0.631                                 | 3.487 | 0.3065                |
| Bachelors                                             | 1.451                             | 0.634                                 | 3.32  | 0.3176                |
| Masters                                               | 0.785                             | 0.34                                  | 1.813 | 0.0734*               |
| <b><i>Electronic medical record data (n= 354)</i></b> | <b><i>Adjusted Odds Ratio</i></b> | <b><i>95% confidence interval</i></b> |       | <b><i>P-Value</i></b> |
| Victim of fraud and/or identity theft                 | 1.152                             | 0.74                                  | 1.795 | 0.5308                |
| Age range (ref = over 60)                             |                                   |                                       |       |                       |
| 18 to 30                                              | 0.543                             | 0.279                                 | 1.056 | 0.549                 |
| 31 to 40                                              | 0.705                             | 0.378                                 | 1.317 | 0.5923                |
| 41 to 50                                              | 0.502                             | 0.253                                 | 0.996 | 0.3802                |
| 51 to 60                                              | 0.5                               | 0.265                                 | 0.946 | 0.3244                |
| Education (ref = Doctorate or other terminal degree)  |                                   |                                       |       |                       |

|                                                      |                            |                                |                |          |
|------------------------------------------------------|----------------------------|--------------------------------|----------------|----------|
| High school                                          | 0.952                      | 0.217                          | 4.179          | 0.9654   |
| Some College/Associates/Trade School                 | 0.982                      | 0.42                           | 2.296          | 0.9753   |
| Bachelors                                            | 1.21                       | 0.534                          | 2.745          | 0.3251   |
| Masters                                              | 0.777                      | 0.338                          | 1.786          | 0.3253   |
| <b>Genetic data (n= 256)</b>                         | <b>Adjusted Odds Ratio</b> | <b>95% confidence interval</b> | <b>P-Value</b> |          |
| Victim of fraud and/or identity theft                | 1.236                      | 0.734                          | 2.082          | 0.4251   |
| Age range (ref = over 60)                            |                            |                                |                |          |
| 18 to 30                                             | 0.723                      | 0.326                          | 1.603          | 0.6707   |
| 31 to 40                                             | 0.844                      | 0.385                          | 1.847          | 0.911    |
| 41 to 50                                             | 0.633                      | 0.298                          | 1.345          | 0.358    |
| 51 to 60                                             | 0.944                      | 0.448                          | 1.987          | 0.5909   |
| Education (ref = Doctorate or other terminal degree) |                            |                                |                |          |
| High school                                          | 0.289                      | 0.047                          | 1.788          | 0.207    |
| Some College/Associates/Trade School                 | 1.077                      | 0.402                          | 2.885          | 0.1074   |
| Bachelors                                            | 0.846                      | 0.331                          | 2.161          | 0.4006   |
| Masters                                              | 0.536                      | 0.206                          | 1.398          | 0.4058   |
| <b>Direct Communication Data</b>                     |                            |                                |                |          |
| <b>Text message and phone data (n= 355)</b>          | <b>Adjusted Odds Ratio</b> | <b>95% confidence interval</b> | <b>P-Value</b> |          |
| Victim of fraud and/or identity theft                | 1.309                      | 0.813                          | 2.107          | 0.2679   |
| Age range (ref = over 60)                            |                            |                                |                |          |
| 18 to 30                                             | 1.064                      | 0.512                          | 2.214          | 0.9078   |
| 31 to 40                                             | 1.62                       | 0.84                           | 3.122          | 0.0871*  |
| 41 to 50                                             | 0.829                      | 0.384                          | 1.793          | 0.322    |
| 51 to 60                                             | 1.112                      | 0.565                          | 2.187          | 0.9562   |
| Education (ref = Doctorate or other terminal degree) |                            |                                |                |          |
| High school                                          | 1.109                      | 0.257                          | 4.789          | 0.6452   |
| Some College/Associates/Trade School                 | 1.018                      | 0.419                          | 2.471          | 0.5229   |
| Bachelors                                            | 0.846                      | 0.357                          | 2.005          | 0.8941   |
| Masters                                              | 0.528                      | 0.215                          | 1.294          | 0.0445** |
| <b>Email history data (n= 358)</b>                   | <b>Adjusted Odds Ratio</b> | <b>95% confidence interval</b> | <b>P-Value</b> |          |
| Victim of fraud and/or identity theft                | 1.334                      | 0.835                          | 2.131          | 0.2275   |
| Age range (ref = over 60)                            |                            |                                |                |          |
| 18 to 30                                             | 0.798                      | 0.388                          | 1.642          | 0.4465   |

|                                                      |                            |                                |        |                |
|------------------------------------------------------|----------------------------|--------------------------------|--------|----------------|
| 31 to 40                                             | 1.135                      | 0.589                          | 2.186  | 0.5047         |
| 41 to 50                                             | 0.756                      | 0.359                          | 1.591  | 0.3599         |
| 51 to 60                                             | 1.268                      | 0.663                          | 2.424  | 0.2474         |
| Education (ref = Doctorate or other terminal degree) |                            |                                |        |                |
| High school                                          | 2.578                      | 0.646                          | 10.283 | 0.1625         |
| Some College/Associates/Trade School                 | 1.717                      | 0.719                          | 4.103  | 0.2414         |
| Bachelors                                            | 1.279                      | 0.546                          | 2.996  | 0.918          |
| Masters                                              | 0.676                      | 0.278                          | 1.647  | 0.007**        |
| <b>Online Browsing or Streaming Data</b>             |                            |                                |        |                |
| <b>Music streaming data (n= 276)</b>                 | <b>Adjusted Odds Ratio</b> | <b>95% confidence interval</b> |        | <b>P-Value</b> |
| Victim of fraud and/or identity theft                | 0.96                       | 0.556                          | 1.661  | 0.8853         |
| Age range (ref = over 60)                            |                            |                                |        |                |
| 18 to 30                                             | 7.593                      | 3.026                          | 19.051 | 0.005**        |
| 31 to 40                                             | 3.48                       | 1.601                          | 7.563  | 0.6685         |
| 41 to 50                                             | 2.8                        | 1.235                          | 6.35   | 0.7088         |
| 51 to 60                                             | 3.976                      | 1.7                            | 9.3    | 0.4048         |
| Education (ref = Doctorate or other terminal degree) |                            |                                |        |                |
| High school                                          | 1.07                       | 0.168                          | 6.792  | 0.8949         |
| Some College/Associates/Trade School                 | 1.186                      | 0.419                          | 3.355  | 0.5302         |
| Bachelors                                            | 0.743                      | 0.279                          | 1.98   | 0.3227         |
| Masters                                              | 0.948                      | 0.349                          | 2.578  | 0.9137         |
| <b>Google search history data (n= 361)</b>           | <b>Adjusted Odds Ratio</b> | <b>95% confidence interval</b> |        | <b>P-Value</b> |
| Victim of fraud and/or identity theft                | 1.267                      | 0.812                          | 1.975  | 0.2969         |
| Age range (ref = over 60)                            |                            |                                |        |                |
| 18 to 30                                             | 1.072                      | 0.549                          | 2.093  | 0.7873         |
| 31 to 40                                             | 1.257                      | 0.674                          | 2.342  | 0.6691         |
| 41 to 50                                             | 0.9                        | 0.453                          | 1.79   | 0.3429         |
| 51 to 60                                             | 1.612                      | 0.859                          | 3.026  | 0.1243         |
| Education (ref = Doctorate or other terminal degree) |                            |                                |        |                |
| High school                                          | 2.178                      | 0.531                          | 8.926  | 0.1231         |
| Some College/Associates/Trade School                 | 1.116                      | 0.49                           | 2.545  | 0.6138         |
| Bachelors                                            | 0.659                      | 0.297                          | 1.462  | 0.0592*        |
| Masters                                              | 0.601                      | 0.267                          | 1.351  | 0.0268**       |

| <b>Financial Data</b>                                      |                                   |                                       |        |                       |
|------------------------------------------------------------|-----------------------------------|---------------------------------------|--------|-----------------------|
| <b><i>Online purchase history data (n= 359)</i></b>        | <b><i>Adjusted Odds Ratio</i></b> | <b><i>95% confidence interval</i></b> |        | <b><i>P-Value</i></b> |
| Victim of fraud and/or identity theft                      | 1.256                             | 0.807                                 | 1.954  | 0.3123                |
| Age range (ref = over 60)                                  |                                   |                                       |        |                       |
| 18 to 30                                                   | 1.611                             | 0.83                                  | 3.126  | 0.5048                |
| 31 to 40                                                   | 1.681                             | 0.903                                 | 3.131  | 0.3598                |
| 41 to 50                                                   | 1.088                             | 0.549                                 | 2.158  | 0.3486                |
| 51 to 60                                                   | 1.675                             | 0.89                                  | 3.15   | 0.3811                |
| Education (ref = Doctorate or other terminal degree)       |                                   |                                       |        |                       |
| High school                                                | 3.859                             | 0.701                                 | 21.242 | 0.0475**              |
| Some College/Associates/Trade School                       | 0.924                             | 0.4                                   | 2.135  | 0.5227                |
| Bachelors                                                  | 0.72                              | 0.321                                 | 1.615  | 0.0818*               |
| Masters                                                    | 0.588                             | 0.258                                 | 1.339  | 0.0125**              |
| <b><i>Tax records and income history data (n= 350)</i></b> | <b><i>Adjusted Odds Ratio</i></b> | <b><i>95% confidence interval</i></b> |        | <b><i>P-Value</i></b> |
| Victim of fraud and/or identity theft                      | 1.403                             | 0.817                                 | 2.41   | 0.22                  |
| Age range (ref = over 60)                                  |                                   |                                       |        |                       |
| 18 to 30                                                   | 1.202                             | 0.526                                 | 2.747  | 0.7196                |
| 31 to 40                                                   | 1.747                             | 0.85                                  | 3.592  | 0.0542**              |
| 41 to 50                                                   | 0.934                             | 0.39                                  | 2.235  | 0.6494                |
| 51 to 60                                                   | 0.756                             | 0.331                                 | 1.725  | 0.2264                |
| Education (ref = Doctorate or other terminal degree)       |                                   |                                       |        |                       |
| High school                                                | 2.635                             | 0.46                                  | 15.1   | 0.1655                |
| Some College/Associates/Trade School                       | 0.932                             | 0.353                                 | 2.464  | 0.601                 |
| Bachelors                                                  | 0.729                             | 0.283                                 | 1.882  | 0.1428                |
| Masters                                                    | 0.829                             | 0.32                                  | 2.148  | 0.3376                |
| <b><i>Credit card statement data (n=343)</i></b>           | <b><i>Adjusted Odds Ratio</i></b> | <b><i>95% confidence interval</i></b> |        | <b><i>P-Value</i></b> |
| Victim of fraud and/or identity theft                      | 1.489                             | 0.856                                 | 2.591  | 0.1587                |
| Age range (ref = over 60)                                  |                                   |                                       |        |                       |
| Indent 18 to 30                                            | 0.746                             | 0.322                                 | 1.732  | 0.8029                |
| Indent 31 to 40                                            | 0.898                             | 0.417                                 | 1.934  | 0.703                 |
| Indent 41 to 50                                            | 0.862                             | 0.372                                 | 1.998  | 0.8327                |
| Indent 51 to 60                                            | 0.591                             | 0.263                                 | 1.328  | 0.2991                |
| Education (ref = Doctorate or other terminal degree)       |                                   |                                       |        |                       |

|                                                      |                                   |                                       |        |                       |
|------------------------------------------------------|-----------------------------------|---------------------------------------|--------|-----------------------|
| High school                                          | 3.504                             | 0.715                                 | 17.178 | 0.0498**              |
| Some College/Associates/Trade School                 | 1.035                             | 0.377                                 | 2.838  | 0.6774                |
| Bachelors                                            | 0.941                             | 0.354                                 | 2.499  | 0.4163                |
| Masters                                              | 0.621                             | 0.227                                 | 1.701  | 0.0264**              |
| <b>Location Data</b>                                 |                                   |                                       |        |                       |
| <b><i>Ridesharing history data (n= 199)</i></b>      | <b><i>Adjusted Odds Ratio</i></b> | <b><i>95% confidence interval</i></b> |        | <b><i>P-Value</i></b> |
| Victim of fraud and/or identity theft                | 1.138                             | 0.62                                  | 2.089  | 0.6765                |
| Age range (ref = over 60)                            |                                   |                                       |        |                       |
| 18 to 30                                             | 3.121                             | 1.264                                 | 7.709  | 0.2016                |
| 31 to 40                                             | 2.468                             | 1.013                                 | 6.01   | 0.6423                |
| 41 to 50                                             | 2.432                             | 0.934                                 | 6.333  | 0.7214                |
| 51 to 60                                             | 2.515                             | 0.955                                 | 6.622  | 0.6427                |
| Education (ref = Doctorate or other terminal degree) |                                   |                                       |        |                       |
| High school                                          | 2.183                             | 0.274                                 | 17.369 | 0.5379                |
| Some College/Associates/Trade School                 | 1.366                             | 0.439                                 | 4.249  | 0.9904                |
| Bachelors                                            | 1.309                             | 0.45                                  | 3.804  | 0.8996                |
| Masters                                              | 1.194                             | 0.404                                 | 3.528  | 0.6742                |
| <b><i>Geolocation data (n= 348)</i></b>              | <b><i>Adjusted Odds Ratio</i></b> | <b><i>95% confidence interval</i></b> |        | <b><i>P-Value</i></b> |
| Victim of fraud and/or identity theft                | 0.997                             | 0.633                                 | 1.571  | 0.9895                |
| Age range (ref = over 60)                            |                                   |                                       |        |                       |
| 18 to 30                                             | 1.125                             | 0.568                                 | 2.231  | 0.981                 |
| 31 to 40                                             | 1.256                             | 0.66                                  | 2.39   | 0.6426                |
| 41 to 50                                             | 0.891                             | 0.437                                 | 1.818  | 0.352                 |
| 51 to 60                                             | 1.475                             | 0.769                                 | 2.829  | 0.2457                |
| Education (ref = Doctorate or other terminal degree) |                                   |                                       |        |                       |
| High school                                          | 1.788                             | 0.405                                 | 7.892  | 0.2669                |
| Some College/Associates/Trade School                 | 1.144                             | 0.492                                 | 2.66   | 0.5255                |
| Bachelors                                            | 0.843                             | 0.372                                 | 1.913  | 0.4923                |
| Masters                                              | 0.533                             | 0.229                                 | 1.237  | 0.0102**              |
| <b><i>Voting History Data (n= 348)</i></b>           | <b><i>Adjusted Odds Ratio</i></b> | <b><i>95% confidence interval</i></b> |        | <b><i>P-Value</i></b> |
| Victim of fraud and/or identity theft                | 0.96                              | 0.612                                 | 1.504  | 0.8572                |
| Age range (ref = over 60)                            |                                   |                                       |        |                       |
| 18 to 30                                             | 3.344                             | 1.661                                 | 6.729  | 0.0078**              |

|                                                      |       |       |       |        |
|------------------------------------------------------|-------|-------|-------|--------|
| 31 to 40                                             | 1.78  | 0.947 | 3.342 | 0.86   |
| 41 to 50                                             | 1.913 | 0.951 | 3.85  | 0.6642 |
| 51 to 60                                             | 1.288 | 0.681 | 2.437 | 0.2108 |
| Education (ref = Doctorate or other terminal degree) |       |       |       |        |
| High school                                          | 1.223 | 0.281 | 5.334 | 0.8401 |
| Some College/Associates/Trade School                 | 1.914 | 0.804 | 4.561 | 0.157  |
| Bachelors                                            | 1.585 | 0.685 | 3.672 | 0.4976 |
| Masters                                              | 1.259 | 0.541 | 2.928 | 0.7322 |

\*\*Significant value ( $p \leq 0.05$ )

\*Modestly significant value ( $p \leq 0.10$ )
