# Supplementary material for: A Survey of Research Participants’ Privacy-Related Experiences and Willingness to Share Real-World Data with Researchers
Source: MDPI journal article supplement (doi:10.3390/jpm12111922), 2022-11-17
Supplement: s1 [file s1]

**Table S9.** Associations between willingness to share real-world data from various sources and experienced reputation being negatively affected as a result of information posted online, adjusted for age range and education level.

| Real-World Data Source                                                        | Logistic regression results |                         |        |         |
|-------------------------------------------------------------------------------|-----------------------------|-------------------------|--------|---------|
| Social Media Data                                                             |                             |                         |        |         |
| Facebook data (n= 248)                                                        | Adjusted Odds Ratio         | 95% confidence interval |        | P-Value |
| Reputation being negatively affected as a result of information posted online | 1.78                        | 0.71                    | 4.466  | 0.2189  |
| Age range (ref = over 60)                                                     |                             |                         |        |         |
| 18 to 30                                                                      | 1.431                       | 0.622                   | 3.294  | 0.1663  |
| 31 to 40                                                                      | 0.771                       | 0.351                   | 1.69   | 0.4037  |
| 41 to 50                                                                      | 0.555                       | 0.239                   | 1.288  | 0.0613* |
| 51 to 60                                                                      | 1.339                       | 0.593                   | 3.022  | 0.2361  |
| Education (ref = Doctorate or other terminal degree)                          |                             |                         |        |         |
| High school                                                                   | 1.873                       | 0.281                   | 12.498 | 0.5157  |
| Some College/Associates/Trade School                                          | 1.418                       | 0.501                   | 4.015  | 0.5666  |
| Bachelors                                                                     | 1.128                       | 0.418                   | 3.046  | 0.8507  |
| Masters                                                                       | 0.794                       | 0.29                    | 2.171  | 0.157   |
| Twitter data (n= 117)                                                         | Adjusted Odds Ratio         | 95% confidence interval |        | P-Value |
| Reputation being negatively affected as a result of information posted online | 3.278                       | 0.608                   | 17.678 | 0.1673  |
| Age range (ref = over 60)                                                     |                             |                         |        |         |
| 18 to 30                                                                      | 3.053                       | 0.844                   | 11.045 | 0.2482  |
| 31 to 40                                                                      | 1.601                       | 0.466                   | 5.502  | 0.7336  |
| 41 to 50                                                                      | 1.06                        | 0.295                   | 3.803  | 0.1924  |
| 51 to 60                                                                      | 4.143                       | 1.021                   | 16.822 | 0.1015* |
| Education (ref = Doctorate or other terminal degree)                          |                             |                         |        |         |
| High school                                                                   | 0.854                       | 0.055                   | 13.275 | 0.8397  |
| Some College/Associates/Trade School                                          | 0.396                       | 0.078                   | 2.008  | 0.22    |
| Bachelors                                                                     | 0.755                       | 0.16                    | 3.569  | 0.8502  |
| Masters                                                                       | 0.649                       | 0.132                   | 3.185  | 0.8704  |
| Instagram data (n= 177)                                                       | Adjusted Odds Ratio         | 95% confidence interval |        | P-Value |
| Reputation being negatively affected as a result of information posted online | 1.604                       | 0.54                    | 4.768  | 0.3952  |
| Age range (ref = over 60)                                                     |                             |                         |        |         |
| 18 to 30                                                                      | 1.345                       | 0.5                     | 3.618  | 0.7519  |

|                                                                               |                            |                                |                |        |
|-------------------------------------------------------------------------------|----------------------------|--------------------------------|----------------|--------|
| 31 to 40                                                                      | 1.132                      | 0.42                           | 3.053          | 0.7912 |
| 41 to 50                                                                      | 1.301                      | 0.446                          | 3.795          | 0.8554 |
| 51 to 60                                                                      | 1.385                      | 0.433                          | 4.432          | 0.7469 |
| Education (ref = Doctorate or other terminal degree)                          |                            |                                |                |        |
| High school                                                                   | 2.25                       | 0.187                          | 27.133         | 0.6315 |
| Some College/Associates/Trade School                                          | 1.444                      | 0.424                          | 4.912          | 0.9789 |
| Bachelors                                                                     | 1.742                      | 0.546                          | 5.555          | 0.5743 |
| Masters                                                                       | 1.053                      | 0.33                           | 3.366          | 0.3912 |
| <b>Snapchat data (n= 99)</b>                                                  | <b>Adjusted Odds Ratio</b> | <b>95% confidence interval</b> | <b>P-Value</b> |        |
| Reputation being negatively affected as a result of information posted online | 1.68                       | 0.476                          | 5.929          | 0.4198 |
| Age range (ref = over 60)                                                     |                            |                                |                |        |
| 18 to 30                                                                      | -                          | -                              | -              | -      |
| 31 to 40                                                                      | -                          | -                              | -              | -      |
| 41 to 50                                                                      | -                          | -                              | -              | -      |
| 51 to 60                                                                      | -                          | -                              | -              | -      |
| Education (ref = Doctorate or other terminal degree)                          |                            |                                |                |        |
| High school                                                                   | 0.86                       | 0.035                          | 21.393         | 0.9835 |
| Some College/Associates/Trade School                                          | 0.369                      | 0.064                          | 2.112          | 0.1295 |
| Bachelors                                                                     | 0.798                      | 0.166                          | 3.822          | 0.9075 |
| Masters                                                                       | 1.645                      | 0.297                          | 9.112          | 0.2119 |
| <b>Yelp reviews and ratings data (n= 160)</b>                                 | <b>Adjusted Odds Ratio</b> | <b>95% confidence interval</b> | <b>P-Value</b> |        |
| Reputation being negatively affected as a result of information posted online | 2.081                      | 0.704                          | 6.151          | 0.1851 |
| Age range (ref = over 60)                                                     |                            |                                |                |        |
| 18 to 30                                                                      | 1.781                      | 0.604                          | 5.247          | 0.971  |
| 31 to 40                                                                      | 2.14                       | 0.792                          | 5.786          | 0.6357 |
| 41 to 50                                                                      | 1.882                      | 0.714                          | 4.962          | 0.9066 |
| 51 to 60                                                                      | 2.681                      | 0.956                          | 7.521          | 0.297  |
| Education (ref = Doctorate or other terminal degree)                          |                            |                                |                |        |
| High school                                                                   | -                          | -                              | -              | -      |
| Some College/Associates/Trade School                                          | 0.959                      | 0.278                          | 3.308          | 0.9706 |
| Bachelors                                                                     | 1.145                      | 0.338                          | 3.885          | 0.9731 |
| Masters                                                                       | 1.167                      | 0.348                          | 3.909          | 0.9734 |
| <b>Health Data</b>                                                            |                            |                                |                |        |

| <b><i>Fitness tracker data (n= 207)</i></b>                                   | <b><i>Adjusted Odds Ratio</i></b> | <b><i>95% confidence interval</i></b> |       | <b><i>P-Value</i></b> |
|-------------------------------------------------------------------------------|-----------------------------------|---------------------------------------|-------|-----------------------|
| Reputation being negatively affected as a result of information posted online | 1.909                             | 0.517                                 | 7.053 | 0.332                 |
| Age range (ref = over 60)                                                     |                                   |                                       |       |                       |
| 18 to 30                                                                      | 2.012                             | 0.671                                 | 6.029 | 0.4215                |
| 31 to 40                                                                      | 1.421                             | 0.559                                 | 3.611 | 0.9457                |
| 41 to 50                                                                      | 1.059                             | 0.419                                 | 2.676 | 0.3444                |
| 51 to 60                                                                      | 2.142                             | 0.728                                 | 6.304 | 0.3344                |
| Education (ref = Doctorate or other terminal degree)                          |                                   |                                       |       |                       |
| High school                                                                   | 0.53                              | 0.068                                 | 4.126 | 0.4616                |
| Some College/Associates/Trade School                                          | 0.887                             | 0.292                                 | 2.693 | 0.8889                |
| Bachelors                                                                     | 1.507                             | 0.48                                  | 4.734 | 0.196                 |
| Masters                                                                       | 0.997                             | 0.354                                 | 2.812 | 0.8354                |
| <b><i>Prescription history data (n= 329)</i></b>                              | <b><i>Adjusted Odds Ratio</i></b> | <b><i>95% confidence interval</i></b> |       | <b><i>P-Value</i></b> |
| Reputation being negatively affected as a result of information posted online | 1.621                             | 0.757                                 | 3.468 | 0.2134                |
| Age range (ref = over 60)                                                     |                                   |                                       |       |                       |
| 18 to 30                                                                      | 1.173                             | 0.591                                 | 2.329 | 0.1223                |
| 31 to 40                                                                      | 0.886                             | 0.466                                 | 1.683 | 0.6659                |
| 41 to 50                                                                      | 0.436                             | 0.21                                  | 0.903 | 0.0213**              |
| 51 to 60                                                                      | 0.738                             | 0.385                                 | 1.413 | 0.7135                |
| Education (ref = Doctorate or other terminal degree)                          |                                   |                                       |       |                       |
| High school                                                                   | 1.164                             | 0.266                                 | 5.099 | 0.9505                |
| Some College/Associates/Trade School                                          | 1.343                             | 0.563                                 | 3.2   | 0.472                 |
| Bachelors                                                                     | 1.369                             | 0.592                                 | 3.168 | 0.3893                |
| Masters                                                                       | 0.846                             | 0.363                                 | 1.972 | 0.2205                |
| <b><i>Electronic medical record data (n= 326)</i></b>                         | <b><i>Adjusted Odds Ratio</i></b> | <b><i>95% confidence interval</i></b> |       | <b><i>P-Value</i></b> |
| Reputation being negatively affected as a result of information posted online | 2.074                             | 0.986                                 | 4.364 | 0.0546*               |
| Age range (ref = over 60)                                                     |                                   |                                       |       |                       |
| 18 to 30                                                                      | 0.418                             | 0.211                                 | 0.829 | 0.3191                |
| 31 to 40                                                                      | 0.562                             | 0.291                                 | 1.084 | 0.8091                |
| 41 to 50                                                                      | 0.44                              | 0.213                                 | 0.906 | 0.4675                |
| 51 to 60                                                                      | 0.411                             | 0.21                                  | 0.802 | 0.2754                |
| Education (ref = Doctorate or other terminal degree)                          |                                   |                                       |       |                       |
| High school                                                                   | 0.62                              | 0.12                                  | 3.192 | 0.6885                |

|                                                                               |                            |                                |       |                |
|-------------------------------------------------------------------------------|----------------------------|--------------------------------|-------|----------------|
| Some College/Associates/Trade School                                          | 0.703                      | 0.292                          | 1.691 | 0.6515         |
| Bachelors                                                                     | 1.023                      | 0.44                           | 2.377 | 0.2763         |
| Masters                                                                       | 0.689                      | 0.293                          | 1.619 | 0.58           |
| <b>Genetic data (n= 234)</b>                                                  | <b>Adjusted Odds Ratio</b> | <b>95% confidence interval</b> |       | <b>P-Value</b> |
| Reputation being negatively affected as a result of information posted online | 2.302                      | 0.894                          | 5.93  | 0.0842*        |
| Age range (ref = over 60)                                                     |                            |                                |       |                |
| 18 to 30                                                                      | 0.495                      | 0.218                          | 1.123 | 0.2915         |
| 31 to 40                                                                      | 0.611                      | 0.265                          | 1.406 | 0.7405         |
| 41 to 50                                                                      | 0.455                      | 0.204                          | 1.016 | 0.1779         |
| 51 to 60                                                                      | 1.018                      | 0.46                           | 2.25  | 0.1521         |
| Education (ref = Doctorate or other terminal degree)                          |                            |                                |       |                |
| High school                                                                   | 0.158                      | 0.015                          | 1.639 | 0.13           |
| Some College/Associates/Trade School                                          | 1.061                      | 0.386                          | 2.923 | 0.1055         |
| Bachelors                                                                     | 0.86                       | 0.329                          | 2.245 | 0.2839         |
| Masters                                                                       | 0.616                      | 0.231                          | 1.642 | 0.9981         |
| <b>Direct Communication Data</b>                                              |                            |                                |       |                |
| <b>Text message and phone data (n= 325)</b>                                   | <b>Adjusted Odds Ratio</b> | <b>95% confidence interval</b> |       | <b>P-Value</b> |
| Reputation being negatively affected as a result of information posted online | 1.475                      | 0.706                          | 3.078 | 0.3009         |
| Age range (ref = over 60)                                                     |                            |                                |       |                |
| 18 to 30                                                                      | 1.049                      | 0.5                            | 2.2   | 0.9897         |
| 31 to 40                                                                      | 1.34                       | 0.672                          | 2.674 | 0.2962         |
| 41 to 50                                                                      | 0.765                      | 0.334                          | 1.748 | 0.2977         |
| 51 to 60                                                                      | 1.16                       | 0.574                          | 2.346 | 0.6696         |
| Education (ref = Doctorate or other terminal degree)                          |                            |                                |       |                |
| High school                                                                   | 1.469                      | 0.314                          | 6.865 | 0.3975         |
| Some College/Associates/Trade School                                          | 1                          | 0.402                          | 2.484 | 0.7437         |
| Bachelors                                                                     | 0.825                      | 0.339                          | 2.01  | 0.6509         |
| Masters                                                                       | 0.544                      | 0.216                          | 1.37  | 0.0451**       |
| <b>Email history data (n= 328)</b>                                            | <b>Adjusted Odds Ratio</b> | <b>95% confidence interval</b> |       | <b>P-Value</b> |
| Reputation being negatively affected as a result of information posted online | 1.705                      | 0.821                          | 3.539 | 0.1522         |
| Age range (ref = over 60)                                                     |                            |                                |       |                |
| 18 to 30                                                                      | 0.691                      | 0.33                           | 1.448 | 0.337          |
| 31 to 40                                                                      | 0.918                      | 0.46                           | 1.831 | 0.9033         |

|                                                                               |                            |                                |        |                |
|-------------------------------------------------------------------------------|----------------------------|--------------------------------|--------|----------------|
| 41 to 50                                                                      | 0.692                      | 0.312                          | 1.532  | 0.3844         |
| 51 to 60                                                                      | 1.28                       | 0.649                          | 2.524  | 0.132          |
| Education (ref = Doctorate or other terminal degree)                          |                            |                                |        |                |
| High school                                                                   | 4.022                      | 0.893                          | 18.118 | 0.0614*        |
| Some College/Associates/Trade School                                          | 1.827                      | 0.742                          | 4.502  | 0.3861         |
| Bachelors                                                                     | 1.302                      | 0.536                          | 3.163  | 0.5965         |
| Masters                                                                       | 0.732                      | 0.29                           | 1.846  | 0.007**        |
| <b>Online Browsing or Streaming Data</b>                                      |                            |                                |        |                |
| <b>Music streaming data (n= 253)</b>                                          | <b>Adjusted Odds Ratio</b> | <b>95% confidence interval</b> |        | <b>P-Value</b> |
| Reputation being negatively affected as a result of information posted online | 2.851                      | 0.997                          | 8.147  | 0.0506**       |
| Age range (ref = over 60)                                                     |                            |                                |        |                |
| 18 to 30                                                                      | 6.48                       | 2.607                          | 16.102 | 0.006**        |
| 31 to 40                                                                      | 3.335                      | 1.487                          | 7.48   | 0.4644         |
| 41 to 50                                                                      | 2.149                      | 0.921                          | 5.015  | 0.4002         |
| 51 to 60                                                                      | 3.338                      | 1.377                          | 8.091  | 0.5132         |
| Education (ref = Doctorate or other terminal degree)                          |                            |                                |        |                |
| High school                                                                   | 1.104                      | 0.166                          | 7.355  | 0.9821         |
| Some College/Associates/Trade School                                          | 1.232                      | 0.437                          | 3.469  | 0.6925         |
| Bachelors                                                                     | 0.95                       | 0.357                          | 2.526  | 0.6376         |
| Masters                                                                       | 1.174                      | 0.43                           | 3.209  | 0.7978         |
| <b>Google search history data (n= 331)</b>                                    | <b>Adjusted Odds Ratio</b> | <b>95% confidence interval</b> |        | <b>P-Value</b> |
| Reputation being negatively affected as a result of information posted online | 1.413                      | 0.684                          | 2.918  | 0.3507         |
| Age range (ref = over 60)                                                     |                            |                                |        |                |
| 18 to 30                                                                      | 0.961                      | 0.484                          | 1.907  | 0.6506         |
| 31 to 40                                                                      | 1.173                      | 0.612                          | 2.248  | 0.6949         |
| 41 to 50                                                                      | 0.841                      | 0.405                          | 1.744  | 0.3572         |
| 51 to 60                                                                      | 1.499                      | 0.78                           | 2.879  | 0.1464         |
| Education (ref = Doctorate or other terminal degree)                          |                            |                                |        |                |
| High school                                                                   | 2.587                      | 0.554                          | 12.079 | 0.1*           |
| Some College/Associates/Trade School                                          | 1.039                      | 0.449                          | 2.407  | 0.9323         |
| Bachelors                                                                     | 0.64                       | 0.283                          | 1.448  | 0.0465**       |
| Masters                                                                       | 0.634                      | 0.278                          | 1.449  | 0.049**        |

| <b>Financial Data</b>                                                         |                            |                                |        |                |
|-------------------------------------------------------------------------------|----------------------------|--------------------------------|--------|----------------|
| <b>Online purchase history data (n= 328)</b>                                  | <b>Adjusted Odds Ratio</b> | <b>95% confidence interval</b> |        | <b>P-Value</b> |
| Reputation being negatively affected as a result of information posted online | 1.417                      | 0.681                          | 2.951  | 0.3515         |
| Age range (ref = over 60)                                                     |                            |                                |        |                |
| 18 to 30                                                                      | 1.318                      | 0.67                           | 2.592  | 0.8661         |
| 31 to 40                                                                      | 1.445                      | 0.755                          | 2.764  | 0.5601         |
| 41 to 50                                                                      | 1.101                      | 0.534                          | 2.267  | 0.5915         |
| 51 to 60                                                                      | 1.552                      | 0.802                          | 3.005  | 0.3814         |
| Education (ref = Doctorate or other terminal degree)                          |                            |                                |        |                |
| High school                                                                   | 6.775                      | 0.746                          | 61.563 | 0.0446**       |
| Some College/Associates/Trade School                                          | 0.882                      | 0.377                          | 2.064  | 0.2814         |
| Bachelors                                                                     | 0.72                       | 0.317                          | 1.638  | 0.0636*        |
| Masters                                                                       | 0.607                      | 0.263                          | 1.402  | 0.017**        |
| <b>Tax records and income history data (n= 322)</b>                           | <b>Adjusted Odds Ratio</b> | <b>95% confidence interval</b> |        | <b>P-Value</b> |
| Reputation being negatively affected as a result of information posted online | 1.256                      | 0.546                          | 2.89   | 0.5921         |
| Age range (ref = over 60)                                                     |                            |                                |        |                |
| 18 to 30                                                                      | 1.143                      | 0.493                          | 2.648  | 0.86           |
| 31 to 40                                                                      | 1.749                      | 0.822                          | 3.725  | 0.0615*        |
| 41 to 50                                                                      | 0.959                      | 0.378                          | 2.435  | 0.7148         |
| 51 to 60                                                                      | 0.786                      | 0.328                          | 1.882  | 0.2955         |
| Education (ref = Doctorate or other terminal degree)                          |                            |                                |        |                |
| High school                                                                   | 2.776                      | 0.441                          | 17.463 | 0.1404         |
| Some College/Associates/Trade School                                          | 0.705                      | 0.26                           | 1.911  | 0.235          |
| Bachelors                                                                     | 0.78                       | 0.302                          | 2.012  | 0.3382         |
| Masters                                                                       | 0.709                      | 0.27                           | 1.867  | 0.2246         |
| <b>Credit card statement data (n=315)</b>                                     | <b>Adjusted Odds Ratio</b> | <b>95% confidence interval</b> |        | <b>P-Value</b> |
| Reputation being negatively affected as a result of information posted online | 1.457                      | 0.623                          | 3.405  | 0.3854         |
| Age range (ref = over 60)                                                     |                            |                                |        |                |
| Indent 18 to 30                                                               | 0.714                      | 0.305                          | 1.676  | 0.6851         |
| Indent 31 to 40                                                               | 0.934                      | 0.423                          | 2.061  | 0.6165         |
| Indent 41 to 50                                                               | 0.861                      | 0.353                          | 2.098  | 0.8528         |
| Indent 51 to 60                                                               | 0.607                      | 0.258                          | 1.424  | 0.354          |
| Education (ref = Doctorate or other terminal degree)                          |                            |                                |        |                |

|                                                                               |                            |                                |        |                |
|-------------------------------------------------------------------------------|----------------------------|--------------------------------|--------|----------------|
| High school                                                                   | 3.52                       | 0.68                           | 18.221 | 0.0499**       |
| Some College/Associates/Trade School                                          | 0.886                      | 0.316                          | 2.48   | 0.4342         |
| Bachelors                                                                     | 0.985                      | 0.369                          | 2.632  | 0.6406         |
| Masters                                                                       | 0.563                      | 0.202                          | 1.573  | 0.0219**       |
| <b>Location Data</b>                                                          |                            |                                |        |                |
| <b>Ridesharing history data (n= 182)</b>                                      | <b>Adjusted Odds Ratio</b> | <b>95% confidence interval</b> |        | <b>P-Value</b> |
| Reputation being negatively affected as a result of information posted online | 1.722                      | 0.604                          | 4.915  | 0.3095         |
| Age range (ref = over 60)                                                     |                            |                                |        |                |
| 18 to 30                                                                      | 2.296                      | 0.919                          | 5.738  | 0.3939         |
| 31 to 40                                                                      | 2.063                      | 0.819                          | 5.2    | 0.6394         |
| 41 to 50                                                                      | 1.914                      | 0.699                          | 5.241  | 0.8492         |
| 51 to 60                                                                      | 2.048                      | 0.753                          | 5.572  | 0.6921         |
| Education (ref = Doctorate or other terminal degree)                          |                            |                                |        |                |
| High school                                                                   | 1.994                      | 0.255                          | 15.616 | 0.5974         |
| Some College/Associates/Trade School                                          | 1.23                       | 0.391                          | 3.868  | 0.8189         |
| Bachelors                                                                     | 1.429                      | 0.489                          | 4.177  | 0.8254         |
| Masters                                                                       | 1.201                      | 0.406                          | 3.557  | 0.7437         |
| <b>Geolocation data (n= 320)</b>                                              | <b>Adjusted Odds Ratio</b> | <b>95% confidence interval</b> |        | <b>P-Value</b> |
| Reputation being negatively affected as a result of information posted online | 1.278                      | 0.611                          | 2.672  | 0.5147         |
| Age range (ref = over 60)                                                     |                            |                                |        |                |
| 18 to 30                                                                      | 0.993                      | 0.497                          | 1.983  | 0.8738         |
| 31 to 40                                                                      | 1.213                      | 0.625                          | 2.355  | 0.4831         |
| 41 to 50                                                                      | 0.82                       | 0.39                           | 1.726  | 0.388          |
| 51 to 60                                                                      | 1.186                      | 0.602                          | 2.338  | 0.5595         |
| Education (ref = Doctorate or other terminal degree)                          |                            |                                |        |                |
| High school                                                                   | 1.134                      | 0.232                          | 5.542  | 0.6235         |
| Some College/Associates/Trade School                                          | 1.012                      | 0.428                          | 2.39   | 0.4915         |
| Bachelors                                                                     | 0.771                      | 0.334                          | 1.777  | 0.6731         |
| Masters                                                                       | 0.506                      | 0.215                          | 1.194  | 0.0382**       |
| <b>Voting History Data (n= 318)</b>                                           | <b>Adjusted Odds Ratio</b> | <b>95% confidence interval</b> |        | <b>P-Value</b> |
| Reputation being negatively affected as a result of information posted online | 1.175                      | 0.552                          | 2.501  | 0.6747         |
| Age range (ref = over 60)                                                     |                            |                                |        |                |
| 18 to 30                                                                      | 2.835                      | 1.394                          | 5.766  | 0.0065**       |

|                                                      |       |       |       |        |
|------------------------------------------------------|-------|-------|-------|--------|
| 31 to 40                                             | 1.447 | 0.752 | 2.786 | 0.9307 |
| 41 to 50                                             | 1.421 | 0.683 | 2.955 | 0.9955 |
| 51 to 60                                             | 0.985 | 0.505 | 1.925 | 0.1261 |
| Education (ref = Doctorate or other terminal degree) |       |       |       |        |
| High school                                          | 1.346 | 0.268 | 6.761 | 0.9197 |
| Some College/Associates/Trade School                 | 1.964 | 0.805 | 4.789 | 0.214  |
| Bachelors                                            | 1.88  | 0.792 | 4.462 | 0.2516 |
| Masters                                              | 1.197 | 0.503 | 2.85  | 0.4704 |

\*\*Significant value ( $p \leq 0.05$ )

\*Modestly significant value ( $p \leq 0.10$ )
