# Supplementary material for: A Survey of Research Participants’ Privacy-Related Experiences and Willingness to Share Real-World Data with Researchers
Source: J Pers Med. 2022 Nov 17;12(11):1922. doi: 10.3390/jpm12111922 (PMC9696408; doi:10.3390/jpm12111922)
Supplement: Supplementary file 1 [file jpm-12-01922-s001.zip]

Archive with 7 entries (7 files):
- Table S10_Privacy of Personal Information was Violated.pdf
- Table S11_Account Accessed wo permission.pdf
- Table S1_Summary of survey respondents demographics .pdf
- Table S7_victim of fraud and_or identity theft.pdf
- Table S8_unpleasant experience as a result of information shared online .pdf
- Table S9_Reputation Neg Affected.pdf
- Tables S2-S6 - Participants willingness to donate data sources_privacy-related experiences.pdf
